# Supplementary material for: An organocatalytic cascade reaction of 2-nitrocyclohexanone and α,β-unsaturated aldehydes with unusual regioselectivity
Source: Royal Society of Chemistry journal article supplement (doi:10.1039/c4cc04298k), 2014-01-01
Supplement: c4cc04298k1.pdf [file c4cc04298k1.pdf]

## Organocatalytic Cascade Reaction of 2-Nitrocyclohexanone and $\alpha$ , $\beta$ -Unsaturated Aldehydes with Unusual Regioselectivity

Yi-ning Xuan,<sup>\*a</sup> Zhen-yu Chen<sup>a</sup> and Ming Yan<sup>\*b</sup>

<sup>\*a</sup> College of Pharmacy, Guangdong Pharmaceutical University, Guangzhou 510006, China. Fax: + 86-20-39352139; Tel: + 86-20-39352139; E-mail: [xuanyn@mail3.sysu.edu.cn](mailto:xuanyn@mail3.sysu.edu.cn)

<sup>\*b</sup> Industrial Institute of Fine Chemicals and Synthetic Drugs, School of Pharmaceutical Sciences, Sun Yat-sen University, Guangzhou 510006, China. Fax: + 86-20-39943049; Tel: + 86-20-39943049; E-mail: [yanming@mail.sysu.edu.cn](mailto:yanming@mail.sysu.edu.cn)

### INDEX

|                                                                                                                               |     |
|-------------------------------------------------------------------------------------------------------------------------------|-----|
| A) General details.....                                                                                                       | S1  |
| B) Screening of additives for the reaction of 2-nitrocyclohexanone and cinnamaldehyde.....                                    | S2  |
| C) General experimental procedure for the reaction of 2-nitrocyclohexanone and $\alpha$ , $\beta$ -unsaturated aldehydes..... | S2  |
| D) Mechanism investigation.....                                                                                               | S2  |
| E) Elaboration of the products <b>4a</b> and <b>4g</b> .....                                                                  | S3  |
| F) X-ray Structure of <b>8g</b> .....                                                                                         | S3  |
| G) NMR spectrum .....                                                                                                         | S10 |
| H) HPLC chromatogram.....                                                                                                     | S32 |

### (A) General details

<sup>1</sup>H and <sup>13</sup>C NMR spectrum were recorded on a Bruker Advance 400 MHz spectrometer as solutions in CDCl<sub>3</sub>. Chemical shifts are reported in ppm relative to residual solvent signals (CDCl<sub>3</sub>, 7.26 ppm for <sup>1</sup>H NMR, CDCl<sub>3</sub>, 77.0 ppm for <sup>13</sup>C NMR), Coupling constants are reported in Hertz (abbreviated for Hz). The following abbreviations are used to designate chemical shift multiplicities: s= singlet, d= doublet, m= multiplet, br=broad. High-resolution mass spectrum were obtained with Shimadazu LCMS-IT-TOF mass spectrometer. Optical rotations were measured using a 1 mL cell with a 1 dm path length on a Perkin-Elmer 341 digital polarimeter and are reported as follows: [ $\alpha$ ]<sub>D</sub><sup>20</sup> (c in gram per 100 mL of solvent). The flash column chromatography was carried out over silica gel (230–400 mesh), purchased from Qingdao Haiyang Chemical Co., Ltd. Melting points were recorded on an electrothermal digital melting point apparatus and were

uncorrected. TLC analysis was performed on precoated silica gel GF<sub>254</sub> slides, and visualised by either UV irradiation or I<sub>2</sub> staining. Infrared (IR) spectrum were recorded on a Bruker Tensor 37 spectrophotometer. Data are represented as frequency of absorption (cm<sup>-1</sup>). Unless otherwise stated, all reagents were obtained from commercial sources and used as received. The solvents were used as commercial anhydrous grade without further purification. 2-Nitrocyclohexanone<sup>1</sup> and 2-methyl-6-nitrocyclohexanone<sup>2</sup> were prepared according to the literature procedure respectively. Enantiomeric excesses were determined by HPLC using a Daicel Chiralcel AD-H column (4.6 mm × 25 cm) and eluting with *n*-hexane/*i*-PrOH solution.

### (B) Screening of additives for the reaction of 2-nitrocyclohexanone and cinnamaldehyde.

**Table 1** Screening of additives<sup>a</sup>

| entry | time (h) | additive                        | yield (%) <sup>b</sup> | dr <sup>c</sup> | ee (%) <sup>d</sup> |
|-------|----------|---------------------------------|------------------------|-----------------|---------------------|
| 1     | 19       | PhCOOH                          | 25                     | 85:15           | 98                  |
| 2     | 9        | Na <sub>2</sub> CO <sub>3</sub> | 15                     | 85:15           | -                   |
| 3     | 9        | K <sub>2</sub> CO <sub>3</sub>  | 24                     | 83:17           | -                   |
| 4     | 9        | KOAc                            | 23                     | 81:19           | -                   |
| 5     | 9        | Et <sub>3</sub> N               | 84                     | 85:15           | 99                  |
| 6     | 9        | DMAP <sup>e</sup>               | 89                     | 85:15           | 99                  |
| 7     | 9        | N-methyl-pyrrolidine            | 90                     | 86:14           | 99                  |
| 8     | 3        | DABCO <sup>f</sup>              | 96                     | 88:12           | 99                  |
| 9     | 9        | DIPEA <sup>g</sup>              | 35                     | 81:19           | 99                  |
| 10    | 9        | NMM <sup>h</sup>                | 23                     | 82:18           | -                   |
| 11    | 9        | 2,6-lutidine                    | 4                      | -               | -                   |

<sup>a</sup> Unless otherwise stated, all reactions were performed with **1** (0.24 mmol), **2a** (0.2 mmol), **3c** (0.02 mmol) and additive (0.02 mmol) in THF (0.5 mL). <sup>b</sup> Determined by HPLC analysis. <sup>c</sup> Determined by <sup>1</sup>H NMR analysis of the crude mixture. <sup>d</sup> Values of the major diastereoisomers and were determined by chiral HPLC. <sup>e</sup> 4-Dimethylaminopyridine. <sup>f</sup> 1, 4-Diazabicyclo[2.2.2]octane. <sup>g</sup> *N,N*-Diisopropylethylamine. <sup>h</sup> *N*-methyl-morpholine.

### (C) General experimental procedure for the reaction of 2-nitrocyclohexanone and $\alpha$ , $\beta$ -unsaturated aldehydes.

To a solution of  $\alpha$ ,  $\beta$ -unsaturated aldehyde (0.2 mmol) in THF (0.5 mL) was added catalyst **3c** (7.2 mg, 0.02 mmol, 10 mol %), DABCO (2.2 mg, 0.02 mmol) at room temperature. After the reaction mixture was stirred for 10 minutes, 2-nitrocyclohexanone (**1**, 34 mg, 0.24 mmol, 1.2 eq) was added. The mixture was stirred at room temperature for 3h. Then it was concentrated under vacuum and purified by flash column chromatography using ethyl acetate / petrol ether as eluent.

The racemic product was obtained by mixing equal amounts of **4** and ent-**4** independently obtained by using catalyst **3c** and its enantiomer.

### (D) Mechanism investigation

To the three portions of solution of **1** (14 mg, 0.1 mmol) in 2.5 mL CDCl<sub>3</sub> was added one equivalent of **3c**, DABCO, DABCO and **3c** respectively. After stirring for 0.5 h, the mixtures were subjected to NMR analysis.

### (E) Elaboration of **4a** and **4g**

Synthesis of **8a**:

The solution of **4a** (27.5 mg, 0.1 mmol) in 1 mL CH<sub>3</sub>OH was refluxed for 3h. Then it was concentrated under vacuum and the residue was purified by flash column chromatography using ethyl acetate / petrol ether as eluent. **8a** was obtained as a white solid.

According to the same procedure, **8g** was also obtained.

Synthesis of **10a**:

To a solution of **8a** (29 mg, 0.1 mmol) in 2.5 mL THF was added Zinc powder (169 mg, 2.6 mmol) and HOAc (162 μL, 2.8 mmol). After the mixture was stirred overnight, it was diluted with EtOAc (30 mL). The organic layer was washed with saturated Na<sub>2</sub>CO<sub>3</sub> (10 mL × 2,) and brine (10 mL). The organic layer was dried over MgSO<sub>4</sub> and concentrated under vacuum. The residue was purified by flash column chromatography.

### (F) X-ray Structure of **8g**

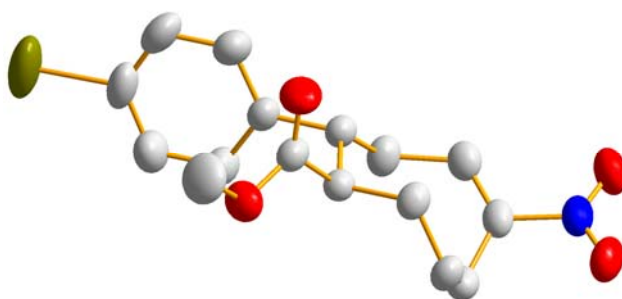

Figure 1. X-ray Structure of **8g**

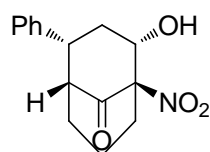

(*1R,2S,4R,5R*)-2-hydroxy-1-nitro-4-phenylbicyclo[3.3.1]nonan-9-one, sticky pale yellow oil, <sup>1</sup>H NMR (400 MHz, CDCl<sub>3</sub>) δ 7.41 - 7.37(m, 2H), 7.32-7.25(m, 3H), δ 5.05 (ddd, *J* = 11.4, 6.8, 1.6 Hz, 1H), 3.24 (dt, *J* = 14.0, 4.8 Hz, 1H), 2.95-2.80(m, 3H), 2.70 (td, *J* = 14.0, 11.4 Hz, 1H), 2.62 (shift to 2.79 in concentrated solution, br, 1H), 2.47-2.40 (m, 1H), 2.23-2.10 (m, 1H), 1.94-1.84 (m, 2H), 1.83-1.73 (m, 1H); <sup>13</sup>C NMR (100 MHz, CDCl<sub>3</sub>) δ 203.79, 138.75, 128.91, 127.47, 127.44, 101.32, 72.37, 51.89, 41.10, 32.61, 31.24, 26.91, 20.14; IR (KBr)  $\nu$ /cm<sup>-1</sup>: 3446, 2937, 1733, 1550, 1033; HRMS (ESI) calcd for C<sub>15</sub>H<sub>16</sub>NO<sub>4</sub>(M - H)<sup>-</sup>: 274.1085, found: 274.1098; [ $\alpha$ ]<sub>D</sub><sup>20</sup> = +106.6 (c = 1.0, CHCl<sub>3</sub>); The enantiomeric excess was determined by HPLC with a Chiralcel AD-H column (4.6 mm × 25 cm) (*n*-hexane/*i*-PrOH = 90/10,  $\lambda$  = 220 nm, 0.8 mL/min); *t*<sub>R</sub> (minor enantiomer) = 20.1 min, *t*<sub>R</sub> (major enantiomer) = 31.8 min, 99% ee.

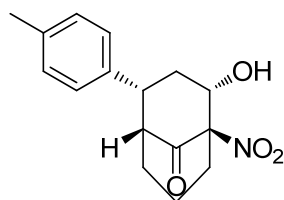

(*1R,2S,4R,5R*)-2-hydroxy-1-nitro-4-(*p*-tolyl)bicyclo[3.3.1]nonan-9-one, sticky pale yellow oil,  $^1\text{H NMR}$  (400 MHz,  $\text{CDCl}_3$ )  $\delta$  7.17 (q,  $J = 8.2$  Hz, 4H), 5.04 (ddd,  $J = 11.4, 6.6, 1.5$  Hz, 1H), 3.20 (dt,  $J = 14.0, 4.8$  Hz, 1H), 2.94 – 2.80 (m, 4H), 2.67 (td,  $J = 14.0, 11.4$  Hz, 1H), 2.44 – 2.37 (m, 1H), 2.35 (s, 3H), 2.20–2.10 (m, 1H), 1.94 – 1.88 (m, 1H), 1.85 – 1.71 (m, 2H);  $^{13}\text{C NMR}$  (100 MHz,  $\text{CDCl}_3$ )  $\delta$  203.98, 137.10, 135.69, 129.53, 127.31, 101.33, 72.39, 51.94, 40.72, 32.77, 31.22, 26.92, 26.88, 20.94, 20.12; IR (KBr)  $\nu/\text{cm}^{-1}$ : 3526, 2926, 1734, 1550, 1079, 1041; HRMS (ESI) calcd for  $\text{C}_{16}\text{H}_{18}\text{NO}_4(\text{M} - \text{H})^-$ : 288.1241, found: 288.1249;  $[\alpha]_{\text{D}}^{20} = +99.0$  ( $c = 1.1, \text{CHCl}_3$ ); The enantiomeric excess was determined by HPLC with a Chiralcel AD-H column (4.6 mm  $\times$  25 cm) (*n*-hexane/*i*-PrOH = 90/10,  $\lambda = 230$  nm, 0.8 mL/min);  $t_{\text{R}}$  (minor enantiomer) = 16.5 min,  $t_{\text{R}}$  (major enantiomer) = 31.3 min, 99% ee.

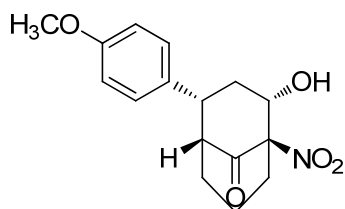

(*1R,2S,4R,5R*)-2-hydroxy-4-(4-methoxyphenyl)-1-nitrobicyclo[3.3.1]nonan-9-one, sticky pale yellow oil,  $^1\text{H NMR}$  (400 MHz,  $\text{CDCl}_3$ )  $\delta$  7.17 (d,  $J = 8.5$  Hz, 2H), 6.91 (d,  $J = 8.5$  Hz, 2H), 5.05 – 5.01 (m, 1H), 3.81 (s, 3H), 3.19 (dt,  $J = 13.8, 4.3$  Hz, 1H), 2.92 – 2.80 (m, 3H), 2.64 (q,  $J = 13.8$  Hz, 1H), 2.44 – 2.37 (m, 1H); 2.20 – 2.09 (m, 1H), 1.89 – 1.83 (m, 2H), 1.80 – 1.74 (m, 1H);  $^{13}\text{C NMR}$  (100 MHz,  $\text{CDCl}_3$ )  $\delta$  204.01, 158.81, 130.69, 128.43, 114.25, 101.30, 72.35, 55.30, 52.05, 40.38, 32.94, 31.22, 26.86, 20.12; IR (KBr)  $\nu/\text{cm}^{-1}$ : 3447, 2935, 1734, 1550, 1514, 1253, 1034; HRMS (ESI) calcd for  $\text{C}_{16}\text{H}_{18}\text{NO}_5(\text{M} - \text{H})^-$ : 304.1190, found: 304.1188;  $[\alpha]_{\text{D}}^{20} = +84.8$  ( $c = 0.9, \text{CHCl}_3$ ); The enantiomeric excess was determined by HPLC with a Chiralcel AD-H column (4.6 mm  $\times$  25 cm) (*n*-hexane/*i*-PrOH = 90/10,  $\lambda = 230$  nm, 0.8 mL/min);  $t_{\text{R}}$  (minor enantiomer) = 27.5 min,  $t_{\text{R}}$  (major enantiomer) = 47.7 min, 99% ee.

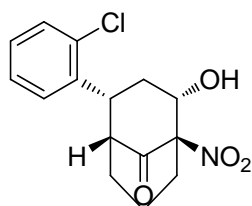

(*1R,2S,4R,5R*)-4-(2-chlorophenyl)-2-hydroxy-1-nitrobicyclo[3.3.1]nonan-9-one, sticky pale yellow oil,  $^1\text{H NMR}$  (400 MHz,  $\text{CDCl}_3$ )  $\delta$  7.44 – 7.38 (m, 2H), 7.36 – 7.32 (m, 1H), 7.29 – 7.24 (m, 1H), 5.09 (ddd,  $J = 11.3, 6.6, 1.6$  Hz, 1H), 3.67 (dt,  $J = 14.0, 4.5$  Hz, 1H), 3.00 (q,  $J = 4.5$  Hz, 1H), 2.97 – 2.83 (m, 3H), 2.76 (td,  $J = 14.0, 11.3$  Hz, 1H), 2.31 (dt,  $J = 14.0, 6.0$  Hz, 1H), 2.24 – 2.17 (m, 1H), 1.87 – 1.82 (m, 2H), 1.81 – 1.74 (m, 1H);  $^{13}\text{C NMR}$  (100 MHz,  $\text{CDCl}_3$ )  $\delta$  203.13, 135.92, 134.18, 130.42, 128.66, 128.00, 126.99, 101.27, 76.70, 76.68, 72.17, 48.17, 37.73, 32.51, 31.20, 26.95, 20.05; IR (KBr)  $\nu/\text{cm}^{-1}$ : 3512, 2927, 1734, 1551, 1531, 1082, 1033; HRMS (ESI) calcd for  $\text{C}_{15}\text{H}_{15}\text{ClNO}_4(\text{M} - \text{H})^-$ : 308.0695, found: 308.0709;  $[\alpha]_{\text{D}}^{20} = +116.1$  ( $c = 1.2, \text{CHCl}_3$ ); The

enantiomeric excess was determined by HPLC with a Chiralcel AD-H column (4.6 mm × 25 cm) (*n*-hexane/*i*-PrOH = 90/10, λ = 220 nm, 0.8 mL/min); *t<sub>R</sub>* (minor enantiomer) = 20.1 min, *t<sub>R</sub>* (major enantiomer) = 32.1 min, 99% ee.

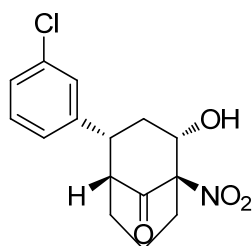

(*1R,2S,4R,5R*)-4-(3-chlorophenyl)-2-hydroxy-1-nitrobicyclo[3.3.1]nonan-9-

one, sticky pale yellow oil, <sup>1</sup>H NMR (400 MHz, CDCl<sub>3</sub>) δ 7.34 – 7.26 (m, 3H), 7.16 – 7.15 (m, 1H), 5.04 (dd, *J* = 11.3, 6.6 Hz, 1H), 3.21 (dt, *J* = 13.9, 4.9 Hz, 1H), 2.94 – 2.80 (m, 4H), 2.65 (td, *J* = 13.9, 11.3 Hz, 1H), 2.46 – 2.39 (m, 1H), 2.22 – 2.06 (m, 1H), 1.91 – 1.85 (m, 2H), 1.83 – 1.75 (m, 1H); <sup>13</sup>C NMR (100 MHz, CDCl<sub>3</sub>) δ 203.34, 140.90, 134.90, 130.14, 127.66, 125.66, 101.16, 72.17, 51.58, 40.71, 32.50, 31.16, 26.88, 20.10; IR (KBr)  $\nu$ /cm<sup>-1</sup>: 3447, 2928, 1734, 1596, 1549, 1081, 1042; HRMS (ESI) calcd for C<sub>15</sub>H<sub>15</sub>ClNO<sub>4</sub> (M - H)<sup>-</sup>: 308.0695, found: 308.0712; [α]<sub>D</sub><sup>20</sup> = +107.6 (c = 0.9, CHCl<sub>3</sub>); The enantiomeric excess was determined by HPLC with a Chiralcel AD-H column (4.6 mm × 25 cm) (*n*-hexane/*i*-PrOH = 90/10, λ = 220 nm, 0.8 mL/min); *t<sub>R</sub>* (minor enantiomer) = 19.9 min, *t<sub>R</sub>* (major enantiomer) = 22.6 min, 99% ee.

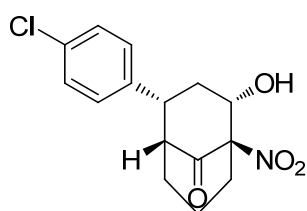

(*1R,2S,4R,5R*)-4-(4-chlorophenyl)-2-hydroxy-1-nitrobicyclo[3.3.1]non-

an-9-one, sticky pale yellow oil, <sup>1</sup>H NMR (400 MHz, CDCl<sub>3</sub>) δ 7.36 (d, *J* = 8.5 Hz, 2H), 7.20 (d, *J* = 8.5 Hz, 2H), 5.09 – 4.99 (m, 1H), 3.22 (dt, *J* = 14.0, 4.8 Hz, 1H), 2.94 – 2.78 (m, 4H), 2.64 (td, *J* = 14.0, 11.2 Hz, 1H), 2.41 (dt, *J* = 14.0, 6.1 Hz, 1H), 2.17 – 2.07 (m, 1H), 1.89 – 1.84 (m, 2H), 1.82 – 1.74 (m, 1H); <sup>13</sup>C NMR (100 MHz, CDCl<sub>3</sub>) δ 203.50, 137.24, 133.32, 129.05, 128.76, 101.17, 72.20, 51.68, 40.49, 32.63, 31.16, 26.83, 20.08; IR (KBr)  $\nu$ /cm<sup>-1</sup>: 3503, 2928, 1734, 1549, 1493, 1092; HRMS (ESI) calcd for C<sub>15</sub>H<sub>15</sub>ClNO<sub>4</sub> (M - H)<sup>-</sup>: 308.0695, found: 308.0690; [α]<sub>D</sub><sup>20</sup> = +96.1 (c = 0.9, CHCl<sub>3</sub>); The enantiomeric excess was determined by HPLC with a Chiralcel AD-H column (4.6 mm × 25 cm) (*n*-hexane/*i*-PrOH = 90/10, λ = 230 nm, 0.8 mL/min); *t<sub>R</sub>* (minor enantiomer) = 25.0 min, *t<sub>R</sub>* (major enantiomer) = 32.6 min, 99% ee.

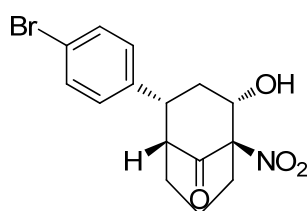

(*1R,2S,4R,5R*)-4-(4-bromophenyl)-2-hydroxy-1-nitrobicyclo[3.3.1]non-

an-9-one, sticky pale yellow oil. <sup>1</sup>H NMR (400 MHz, CDCl<sub>3</sub>) δ 7.51 (d, *J* = 8.3 Hz, 2H), 7.14 (d, *J* =

8.3 Hz, 2H), 5.04 (ddd,  $J = 11.3, 6.7, 1.6$  Hz, 1H), 3.20 (dt,  $J = 14.0, 4.8$  Hz, 1H), 2.93 – 2.75 (m, 4H), 2.64 (td,  $J = 14.0, 11.3$  Hz, 1H), 2.41 (dt,  $J = 14.0, 6.0$  Hz, 1H), 2.17 – 2.07 (m, 1H), 1.89 – 1.84 (m, 2H), 1.82 – 1.74 (m, 1H);  $^{13}\text{C}$  NMR (100 MHz,  $\text{CDCl}_3$ )  $\delta$  203.56, 137.79, 131.98, 129.13, 121.33, 101.17, 72.17, 51.62, 40.50, 32.58, 31.13, 26.85, 20.06; IR (KBr)  $\nu/\text{cm}^{-1}$ : 3448, 2928, 1733, 1549, 1489, 1454, 1077; HRMS (ESI) calcd for  $\text{C}_{15}\text{H}_{15}\text{BrNO}_4$  ( $M - \text{H}$ ) $^-$ : 352.0190, found: 352.0179;  $[\alpha]_{\text{D}}^{20} = +87.7$  ( $c = 1.0, \text{CHCl}_3$ ); The enantiomeric excess was determined by HPLC with a Chiralcel AD-H column (4.6 mm  $\times$  25 cm) ( $n$ -hexane/ $i$ -PrOH = 90/10,  $\lambda = 220$  nm, 0.8 mL/min);  $t_{\text{R}}$  (minor enantiomer) = 26.2 min,  $t_{\text{R}}$  (major enantiomer) = 33.7 min, 99% ee.

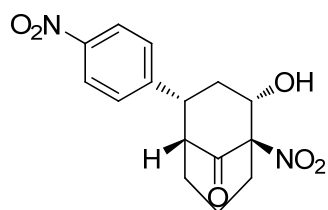

(*1R,2S,4R,5R*)-2-hydroxy-1-nitro-4-(4-nitrophenyl)bicyclo[3.3.1]non

an-9-one, sticky pale yellow oil.  $^1\text{H}$  NMR (400 MHz,  $\text{CDCl}_3$ )  $\delta$  8.25 (d,  $J = 8.8$  Hz, 2H), 7.46 (d,  $J = 8.8$  Hz, 2H), 5.07 (ddd,  $J = 11.2, 6.7, 1.7$  Hz, 1H), 3.35 (dt,  $J = 13.9, 4.7$  Hz, 1H), 2.96 – 2.82 (m, 4H), 2.72 (td,  $J = 13.9, 11.2$  Hz, 1H), 2.51 – 2.45 (m, 1H), 2.23 – 2.09 (m, 1H), 1.95 – 1.87 (m, 1H), 1.85 – 1.76 (m, 2H);  $^{13}\text{C}$  NMR (100 MHz,  $\text{CDCl}_3$ )  $\delta$  202.82, 147.27, 146.25, 128.40, 124.10, 101.01, 72.01, 51.31, 40.91, 32.37, 31.10, 26.83, 20.06; IR (KBr)  $\nu/\text{cm}^{-1}$ : 3445, 2922, 2851, 1719, 1551, 1520, 1347, 1054; HRMS (ESI) calcd for  $\text{C}_{15}\text{H}_{15}\text{N}_2\text{O}_6$  ( $M - \text{H}$ ) $^-$ : 319.0936, found: 319.0955;  $[\alpha]_{\text{D}}^{20} = +80.9$  ( $c = 0.6, \text{CHCl}_3$ ); The enantiomeric excess was determined by HPLC with a Chiralcel AD-H column (4.6 mm  $\times$  25 cm) ( $n$ -hexane/ $i$ -PrOH = 80/20,  $\lambda = 254$  nm, 0.8 mL/min);  $t_{\text{R}}$  (minor enantiomer) = 25.7 min,  $t_{\text{R}}$  (major enantiomer) = 33.6 min, 99% ee.

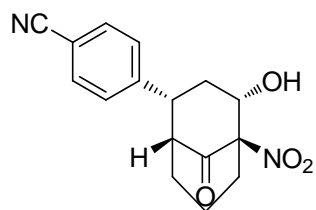

4-((*1R,2R,4S,5R*)-4-hydroxy-5-nitro-9-oxobicyclo[3.3.1]nonan-2-yl)be

nzonitrile, sticky pale yellow oil.  $^1\text{H}$  NMR (400 MHz,  $\text{CDCl}_3$ )  $\delta$  7.69 (d,  $J = 8.2$  Hz, 2H), 7.39 (d,  $J = 8.2$  Hz, 2H), 5.06 (ddd,  $J = 11.3, 6.7, 1.6$  Hz, 1H), 3.29 (dt,  $J = 14.0, 4.8$  Hz, 1H), 2.94 – 2.79 (m, 4H), 2.68 (td,  $J = 14.0, 11.3$  Hz, 1H), 2.48 – 2.41 (m, 1H), 2.20 – 2.06 (m, 1H), 1.94 – 1.85 (m, 1H), 1.84 – 1.76 (m, 2H);  $^{13}\text{C}$  NMR (100 MHz,  $\text{CDCl}_3$ )  $\delta$  203.10, 144.31, 132.67, 128.30, 118.33, 111.39, 101.03, 71.98, 51.32, 40.95, 32.32, 31.04, 26.88, 20.01; IR (KBr)  $\nu/\text{cm}^{-1}$ : 3442, 1734, 1638, 1551, 1082; HRMS (ESI) calcd for  $\text{C}_{16}\text{H}_{15}\text{N}_2\text{O}_4$  ( $M - \text{H}$ ) $^-$ : 299.1037, found: 299.1026;  $[\alpha]_{\text{D}}^{20} = +90.3$  ( $c = 1.0, \text{CHCl}_3$ ); The enantiomeric excess was determined by HPLC with a Chiralcel AD-H column (4.6 mm  $\times$  25 cm) ( $n$ -hexane/ $i$ -PrOH = 90/10,  $\lambda = 230$  nm, 0.8 mL/min);  $t_{\text{R}}$  (minor enantiomer) = 22.9 min,  $t_{\text{R}}$  (major enantiomer) = 30.5 min, 99% ee.

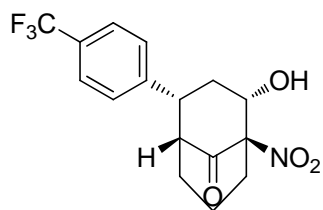

(1*R*,2*S*,4*R*,5*R*)-2-hydroxy-1-nitro-4-(4-(trifluoromethyl)phenyl)bicyclo

[3.3.1]nonan-9-one, sticky pale yellow oil.  $^1\text{H NMR}$  (400 MHz,  $\text{CDCl}_3$ )  $\delta$  7.65 (d,  $J = 8.0$  Hz, 2H), 7.40 (d,  $J = 8.0$  Hz, 2H), 5.09 – 5.05 (m, 1H), 3.31 (dt,  $J = 14.0, 4.8$  Hz, 1H), 2.96 – 2.81 (m, 4H), 2.71 (td,  $J = 14.0, 11.3$  Hz, 1H), 2.45 (dt,  $J = 14.0, 6.1$  Hz, 1H), 2.21– 2.09 (m, 1H), 1.93 – 1.83 (m, 2H), 1.82–1.73 (m, 1H);  $^{13}\text{C NMR}$  (100 MHz,  $\text{CDCl}_3$ )  $\delta$  203.29, 142.88, 129.99, 129.67, 127.87, 125.86 (q,  $J = 3.9$  Hz), 125.28, 122.57, 101.15, 72.17, 51.54, 40.85, 32.47, 31.15, 26.89, 20.08;  $^{19}\text{F NMR}$  (376 MHz,  $\text{CDCl}_3$ )  $\delta$  -62.63; IR (KBr)  $\nu/\text{cm}^{-1}$ : 3525, 2943, 1735, 1551, 1328, 1167, 1124, 1069; HRMS (ESI) calcd for  $\text{C}_{16}\text{H}_{15}\text{F}_3\text{NO}_4$  (M - H) $^-$ : 342.0959, found: 342.0950;  $[\alpha]_{\text{D}}^{20} = +75.3$  ( $c = 1.0$ ,  $\text{CHCl}_3$ ); The enantiomeric excess was determined by HPLC with a Chiralcel AD-H column (4.6 mm  $\times$  25 cm) (*n*-hexane/*i*-PrOH = 90/10,  $\lambda = 230$  nm, 0.8 mL/min);  $t_{\text{R}}$  (minor enantiomer) = 19.8 min,  $t_{\text{R}}$  (major enantiomer) = 21.4 min, 95% ee.

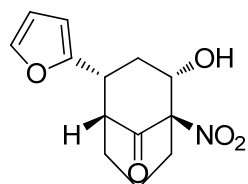

(1*R*,2*S*,4*R*,5*R*)-4-(furan-2-yl)-2-hydroxy-1-nitrobicyclo[3.3.1]nonan-9-one,

sticky pale yellow oil,  $^1\text{H NMR}$  (400 MHz,  $\text{CDCl}_3$ )  $\delta$  7.38 (d,  $J = 1.8$  Hz, 1H), 6.35 (dd,  $J = 3.3, 1.8$  Hz, 1H), 6.20 (d,  $J = 3.3$  Hz, 1H), 5.04 – 4.99 (m, 1H), 3.29 (td,  $J = 9.8, 4.6$  Hz, 1H), 3.06 – 3.03 (m, 1H), 2.88 – 2.77 (m, 3H), 2.53 – 2.49 (m, 2H), 2.14 – 2.04 (m, 1H), 1.97 – 1.86 (m, 2H), 1.78 – 1.71 (m, 1H);  $^{13}\text{C NMR}$  (100 MHz,  $\text{CDCl}_3$ )  $\delta$  203.28, 152.80, 142.25, 110.27, 106.73, 101.28, 71.94, 49.26, 35.67, 31.86, 31.14, 27.91, 19.90; IR (KBr)  $\nu/\text{cm}^{-1}$ : 3542, 2948, 2921, 1737, 1545, 1083, 1009; HRMS (ESI) calcd for  $\text{C}_{13}\text{H}_{14}\text{NO}_5$  (M - H) $^-$ : 264.0877, found: 264.0883;  $[\alpha]_{\text{D}}^{20} = +93.1$  ( $c = 0.8$ ,  $\text{CHCl}_3$ ); The enantiomeric excess was determined by HPLC with a Chiralcel AD-H column (4.6 mm  $\times$  25 cm) (*n*-hexane/*i*-PrOH = 90/10,  $\lambda = 230$  nm, 0.8 mL/min);  $t_{\text{R}}$  (minor enantiomer) = 18.1 min,  $t_{\text{R}}$  (major enantiomer) = 24.8 min, 99% ee.

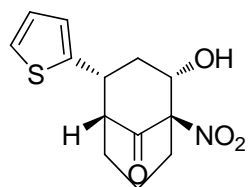

(1*R*,2*S*,4*R*,5*R*)-2-hydroxy-1-nitro-4-(thiophen-2-yl)bicyclo[3.3.1]nonan-9-o

ne, pale yellow oil,  $^1\text{H NMR}$  (400 MHz,  $\text{CDCl}_3$ )  $\delta$  7.27 – 7.26 (m, 1H), 7.02 (dd,  $J = 5.1, 3.6$  Hz, 1H), 6.93 (dt,  $J = 3.6, 1.1$  Hz, 1H), 5.04 – 4.99 (m, 1H), 3.53 – 3.47 (m, 1H), 2.95 – 2.90 (m, 1H), 2.90 – 2.81 (m, 2H), 2.63 – 2.57 (m, 2H), 2.18 – 1.90 (m, 4H), 1.81 – 1.73 (m, 1H);  $^{13}\text{C NMR}$  (100 MHz,  $\text{CDCl}_3$ )  $\delta$  203.47, 142.56, 127.06, 124.58, 124.43, 101.16, 71.84, 52.13, 37.08, 34.47, 31.13, 27.36, 19.90; IR (KBr)  $\nu/\text{cm}^{-1}$ : 3582, 2942, 1731, 1545, 1077; HRMS (ESI) calcd for  $\text{C}_{13}\text{H}_{14}\text{NO}_4\text{S}$  (M - H) $^-$ : 280.0649, found: 280.0638;  $[\alpha]_{\text{D}}^{20} = +107.1$  ( $c = 1.1$ ,  $\text{CHCl}_3$ ); The enantiomeric excess was determined by HPLC with a Chiralcel AD-H column (4.6 mm  $\times$  25 cm) (*n*-hexane/*i*-PrOH = 90/10,

$\lambda = 230$  nm, 0.8 mL/min);  $t_R$  (minor enantiomer) = 20.5 min,  $t_R$  (major enantiomer) = 28.9 min, 99% ee.

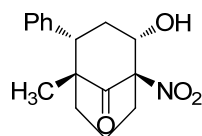

(1*R*,2*S*,4*S*,5*R*)-2-hydroxy-5-methyl-1-nitro-4-phenylbicyclo[3.3.1]nonan-9-one,

sticky pale yellow oil,  $^1\text{H}$  NMR (400 MHz,  $\text{CDCl}_3$ )  $\delta$  7.40 – 7.30 (m, 3H), 7.28 – 7.22 (m, 2H), 5.07 – 5.01 (m, 1H), 3.02 – 2.96 (m, 1H), 2.93 – 2.85 (m, 1H), 2.83 – 2.71 (m, 3H), 2.51 – 2.33 (m, 2H), 2.18 (ddd,  $J = 12.5, 5.7, 2.9$  Hz, 1H), 1.90 – 1.81 (m, 1H), 1.64 – 1.55 (m, 1H), 0.86 (s, 3H);  $^{13}\text{C}$  NMR (100 MHz,  $\text{CDCl}_3$ )  $\delta$  204.77, 138.05, 129.20, 128.52, 127.68, 101.97, 72.01, 50.64, 48.37, 35.25, 31.31, 22.41, 20.07. IR (KBr)  $\nu/\text{cm}^{-1}$ : 2931, 1720, 1547, 1456, 1287, 1037, 770; HRMS (ESI) calcd for  $\text{C}_{16}\text{H}_{18}\text{NO}_4$  (M - H) $^-$ : 288.1241, found: 288.1236;  $[\alpha]_D^{20} = +66.3$  ( $c = 1.1$ ,  $\text{CHCl}_3$ ); The enantiomeric excess was determined by HPLC with a Chiralcel AD-H column (4.6 mm  $\times$  25 cm) ( $n$ -hexane/ $i$ -PrOH = 90/10,  $\lambda = 220$  nm, 0.8 mL/min);  $t_R$  (minor enantiomer) = 15.7 min,  $t_R$  (major enantiomer) = 28.9 min, 86% ee.

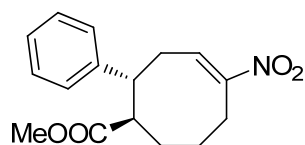

(1*R*,2*R*)-methyl 5-nitro-2-phenylcyclooct-4-ene-1-carboxylate, white

solid  $^1\text{H}$  NMR (400 MHz,  $\text{CDCl}_3$ )  $\delta$  7.32 – 7.27 (m, 3H), 7.23 – 7.19 (m, 1H), 7.15 (d,  $J = 7.4$  Hz, 2H), 3.36 (s, 4H), 3.05 – 2.99 (m, 1H), 2.82 – 2.75 (m, 3H), 2.57 (dt,  $J = 14.1, 7.4$  Hz, 1H), 2.02 – 1.98 (m, 2H), 1.83 – 1.81 (m, 2H);  $^{13}\text{C}$  NMR (100 MHz,  $\text{CDCl}_3$ )  $\delta$  175.31, 152.57, 142.92, 133.80, 128.67, 127.13, 127.07, 51.46, 49.67, 48.23, 33.25, 30.04, 27.67, 25.36; mp: 98–99 °C; IR (KBr)  $\nu/\text{cm}^{-1}$ : 2946, 2855, 1730, 1521, 1437, 1367, 1332, 1162; HRMS (ESI) calcd for  $\text{C}_{16}\text{H}_{18}\text{NO}_4$  (M - H) $^-$ : 288.1241, found: 288.1233;  $[\alpha]_D^{20} = -44.9$  ( $c = 1.0$ ,  $\text{CHCl}_3$ ); The enantiomeric excess was determined by HPLC with a Chiralcel AD-H column (4.6 mm  $\times$  25 cm) ( $n$ -hexane/ $i$ -PrOH = 98/2,  $\lambda = 254$  nm, 0.8 mL/min);  $t_R$  (minor enantiomer) = 14.5 min,  $t_R$  (major enantiomer) = 15.7 min, 99% ee.

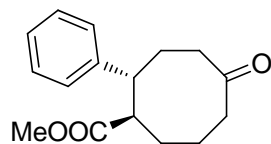

(1*R*,2*R*)-methyl 5-oxo-2-phenylcyclooctanecarboxylate, white solid,  $^1\text{H}$

NMR (400 MHz,  $\text{CDCl}_3$ )  $\delta$  7.28 – 7.24 (m, 2H), 7.22 – 7.15 (m, 3H), 3.32 (s, 3H), 3.12 – 3.01 (m, 2H), 2.85 – 2.80 (m, 1H), 2.51 – 2.44 (m, 1H), 2.41 – 2.26 (m, 2H), 2.16 (ddd,  $J = 16.1, 7.9, 3.3$  Hz, 1H), 2.07 – 1.81 (m, 5H);  $^{13}\text{C}$  NMR (100 MHz,  $\text{CDCl}_3$ )  $\delta$  176.05, 162.64, 144.16, 128.22, 127.76, 126.37, 51.27, 48.26, 47.05, 31.90, 29.77, 29.57, 27.17, 24.85. mp: 88–90 °C; IR (KBr)  $\nu/\text{cm}^{-1}$ : 3062, 3028, 2923, 1735, 1434, 1162, 962; HRMS (ESI) calcd for  $\text{C}_{16}\text{H}_{19}\text{O}_3$  (M - H) $^-$ : 259.1340, found: 259.1348;  $[\alpha]_D^{20} = +2.6$  ( $c = 0.5$ ,  $\text{CHCl}_3$ ); The enantiomeric excess was determined by HPLC with a Chiralcel AD-H column (4.6 mm  $\times$  25 cm) ( $n$ -hexane/ $i$ -PrOH = 85/15,  $\lambda = 208$  nm, 0.8 mL/min);  $t_R$  (minor enantiomer) = 16.3 min,  $t_R$  (major enantiomer) = 17.1 min, 99% ee.



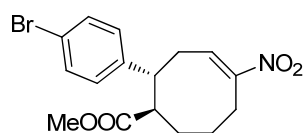

(1R,2R)-methyl 2-(4-bromophenyl)-5-nitrocyclooct-4-ene-1-carboxylate,

white solid,  $^1\text{H}$  NMR (400 MHz,  $\text{CDCl}_3$ )  $\delta$  7.42 (d,  $J = 8.4$  Hz, 2H), 7.25 (dd,  $J = 9.8, 7.4$  Hz, 1H), 7.04 (d,  $J = 8.4$  Hz, 2H), 3.40 (s, 3H), 3.35 (ddd,  $J = 11.3, 7.1, 4.2$  Hz, 1H), 3.06 – 2.99 (m, 1H), 2.81 – 2.73 (m, 3H), 2.53 (dt,  $J = 14.2, 7.4$  Hz, 1H), 2.05 – 1.97 (m, 2H), 1.85 – 1.78 (m, 1H);  $^{13}\text{C}$  NMR (100 MHz,  $\text{CDCl}_3$ )  $\delta$  175.07, 152.75, 141.89, 133.24, 131.82, 128.85, 120.90, 51.67, 49.42, 47.54, 33.04, 30.05, 27.66, 25.35. mp: 107~109 °C; IR (KBr)  $\nu/\text{cm}^{-1}$ : 2947, 2870, 1720, 1522, 1436, 1333, 1158, 1010; HRMS (ESI) calcd for  $\text{C}_{16}\text{H}_{17}\text{BrNO}_4$  ( $\text{M} - \text{H}$ ) $^-$ : 366.0346, found: 366.0340;  $[\alpha]_{\text{D}}^{20} = -80.9$  ( $c = 1.0$ ,  $\text{CHCl}_3$ ); The enantiomeric excess was determined by HPLC with a Chiralcel AD-H column (4.6 mm  $\times$  25 cm) ( $n$ -hexane/ $i$ -PrOH = 95/5,  $\lambda = 230$  nm, 0.8 mL/min);  $t_{\text{R}}$  (minor enantiomer) = 14.9 min,  $t_{\text{R}}$  (major enantiomer) = 17.2 min, 99% ee.

#### Reference:

- 1 P. Dampawan and W. W. Zajac, Jr., *Synthesis*, 1983, 545.
- 2 R. Ballini, G. Bartoli, R. Castagnani, E. Marcantoni and M. Petrini, *Synlett*, 1992, 64.

(G) NMR spectrum

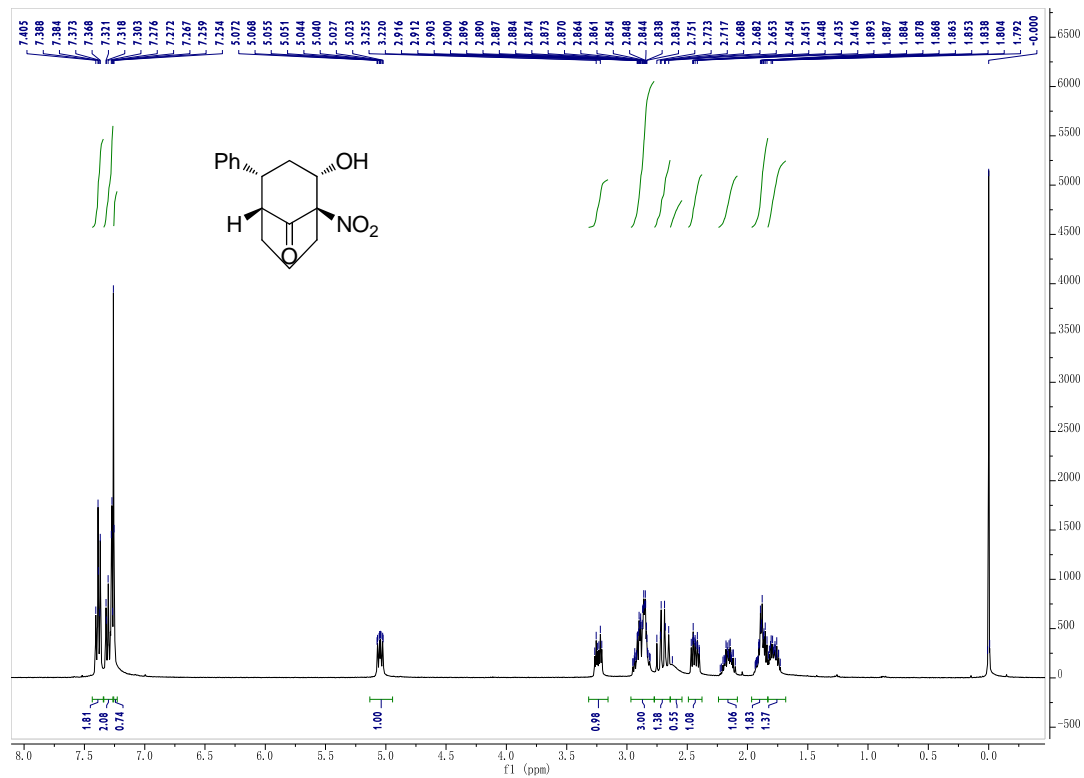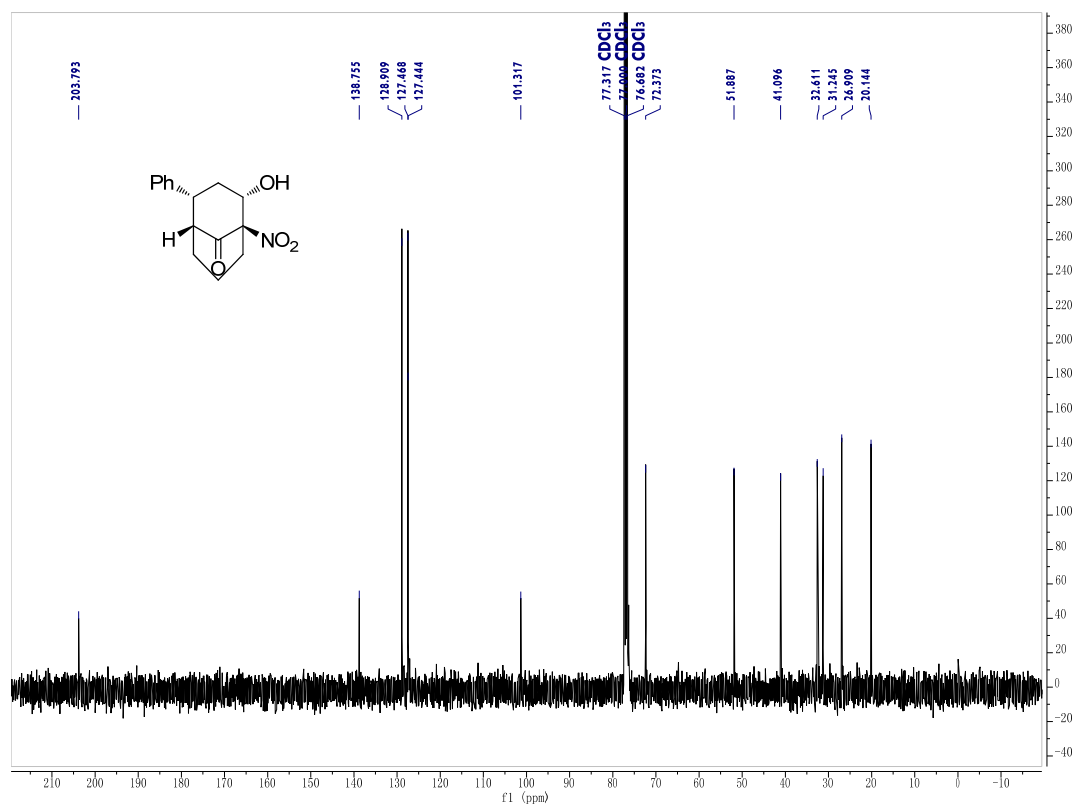

Dept 90 spectrum

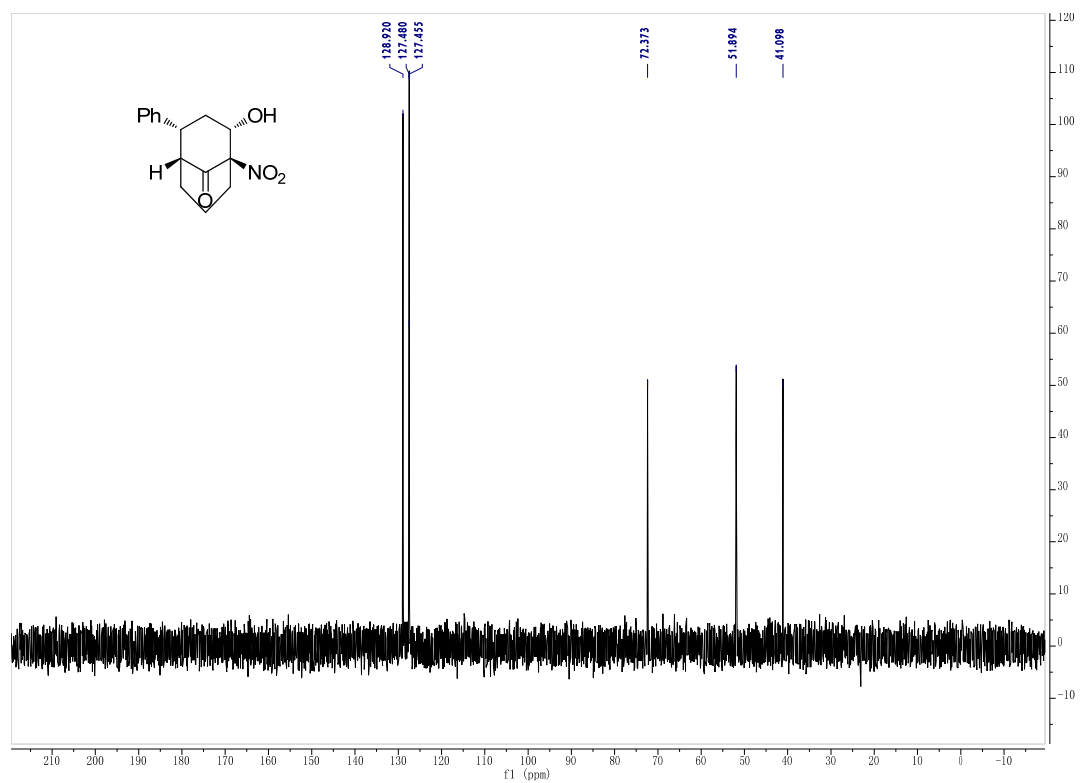

Dept 135 spectrum

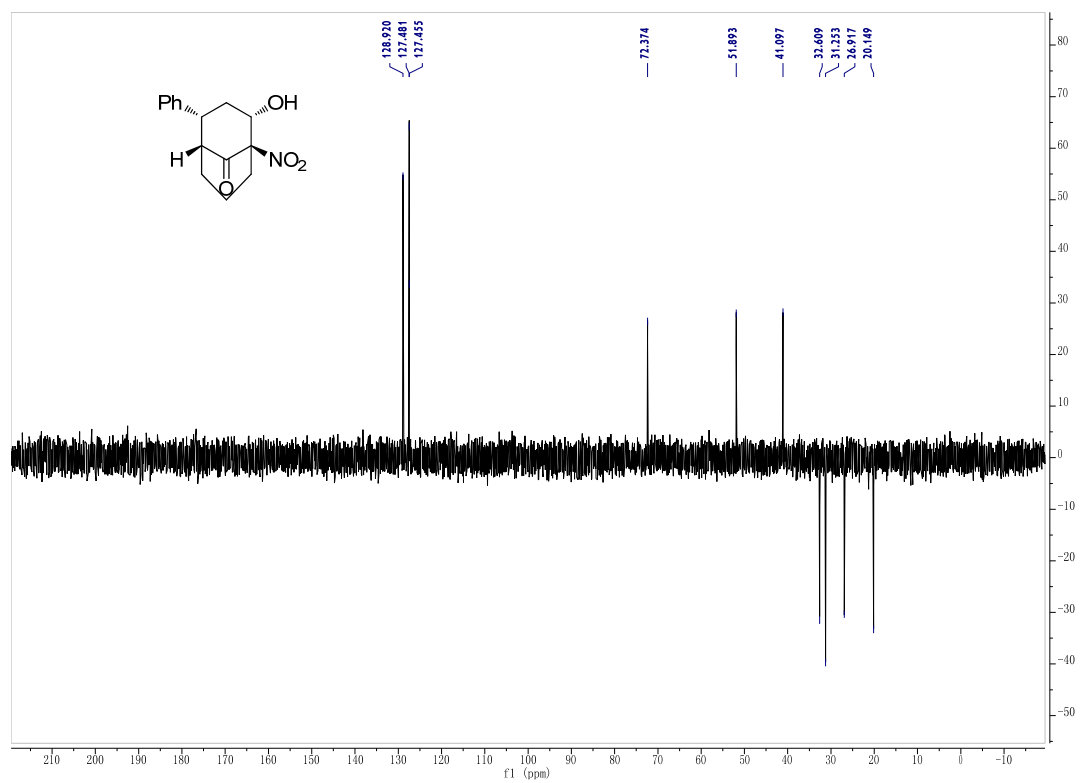

H, H-Cosy spectrum

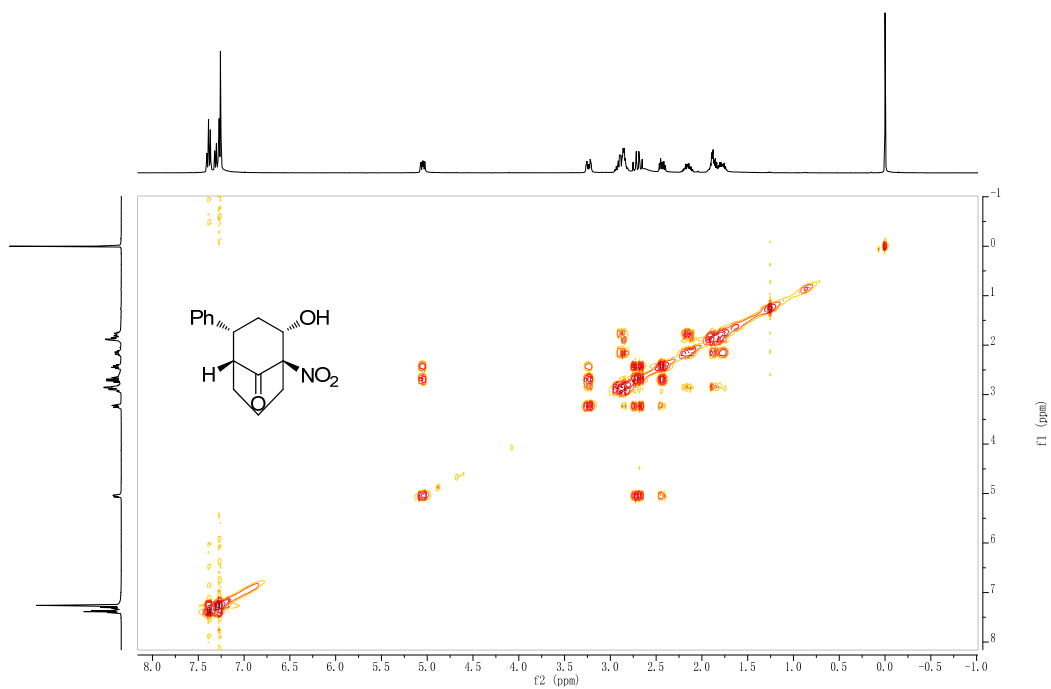

HMQC spectrum

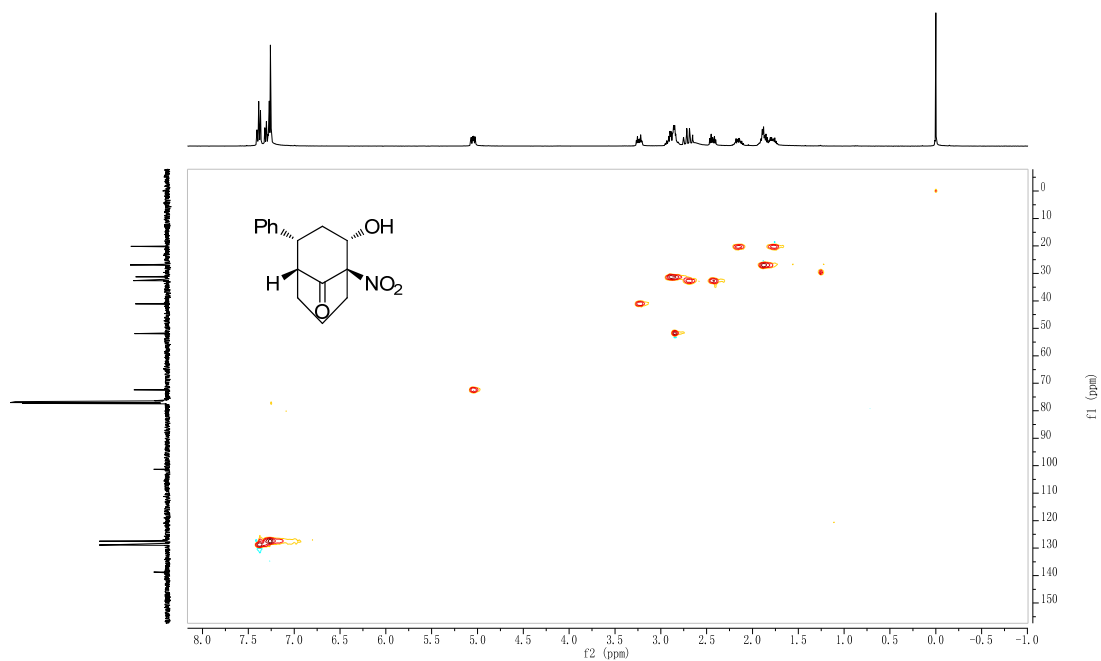

HMBC spectrum

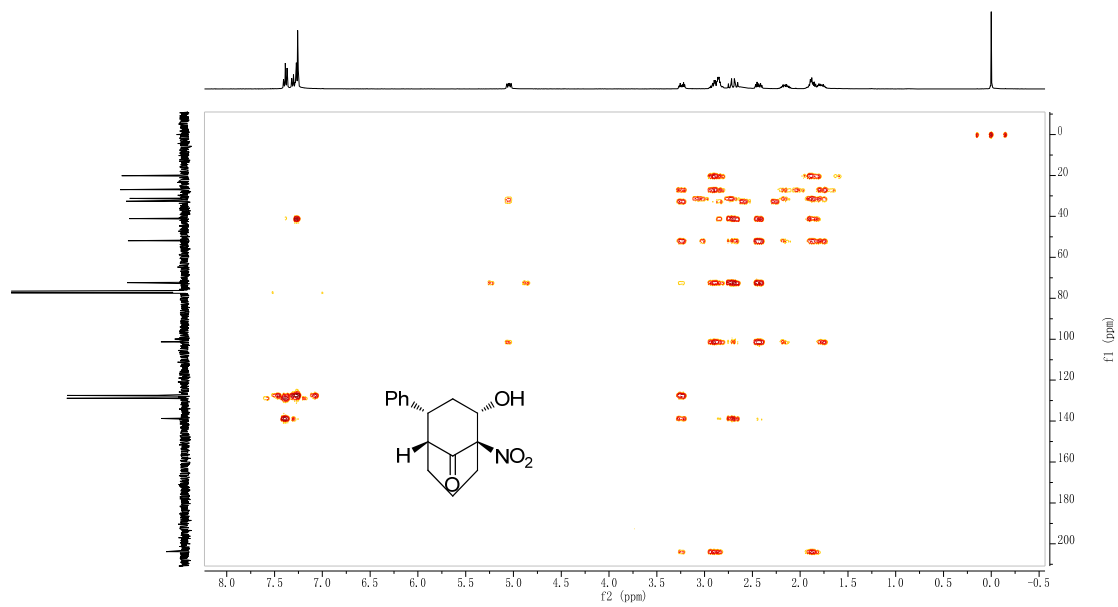

NOE spectrum

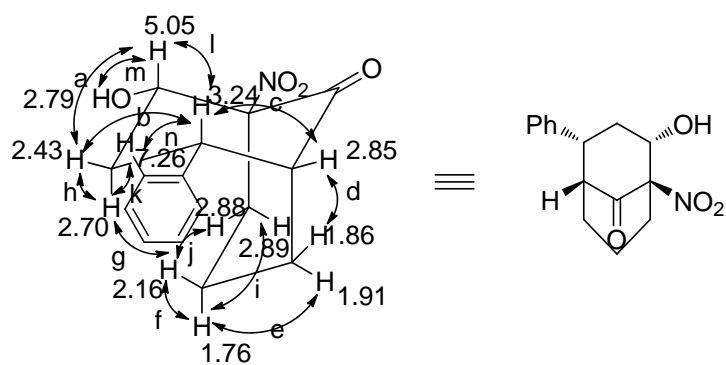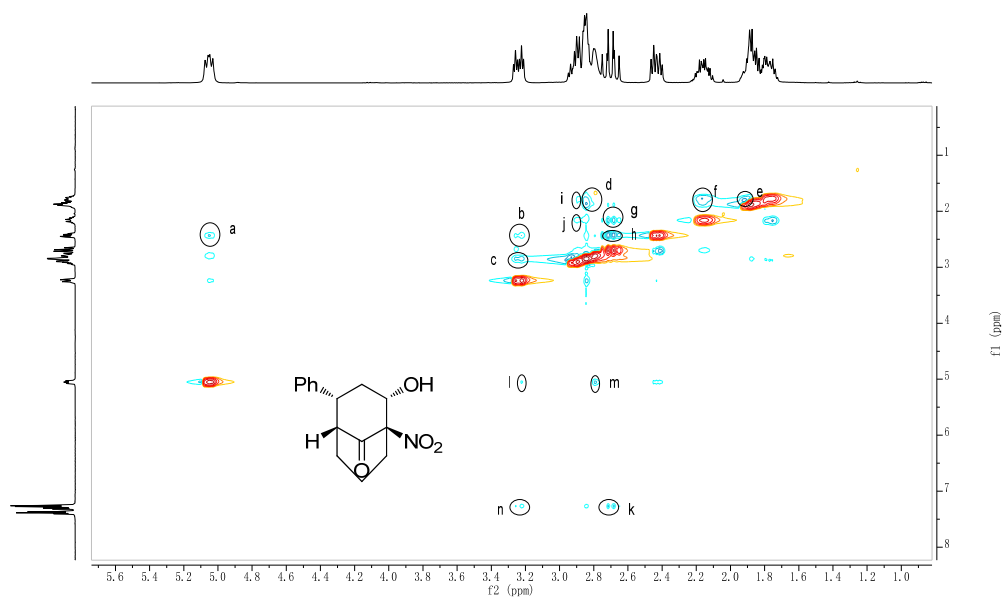

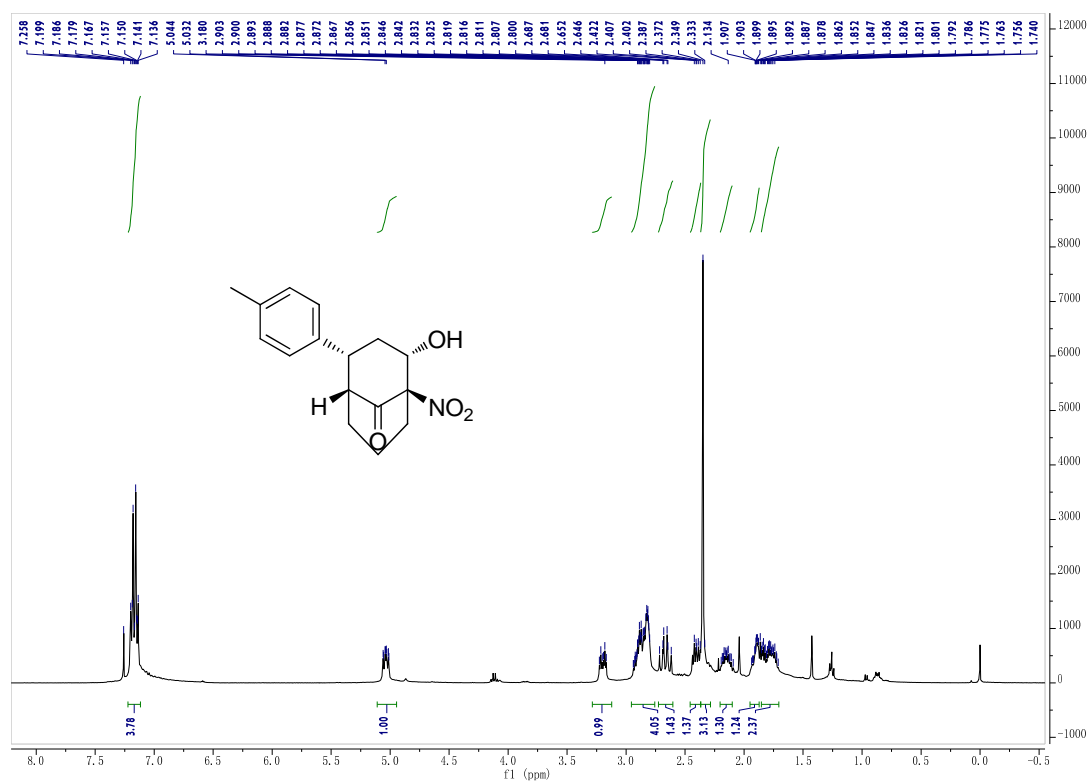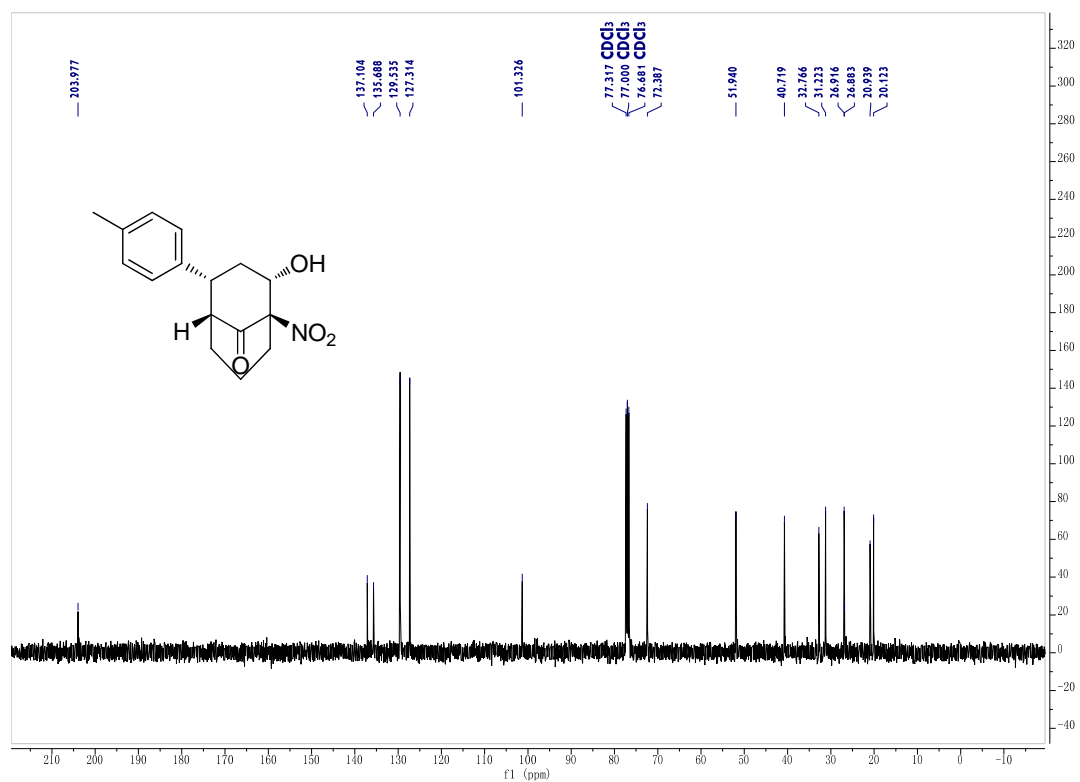

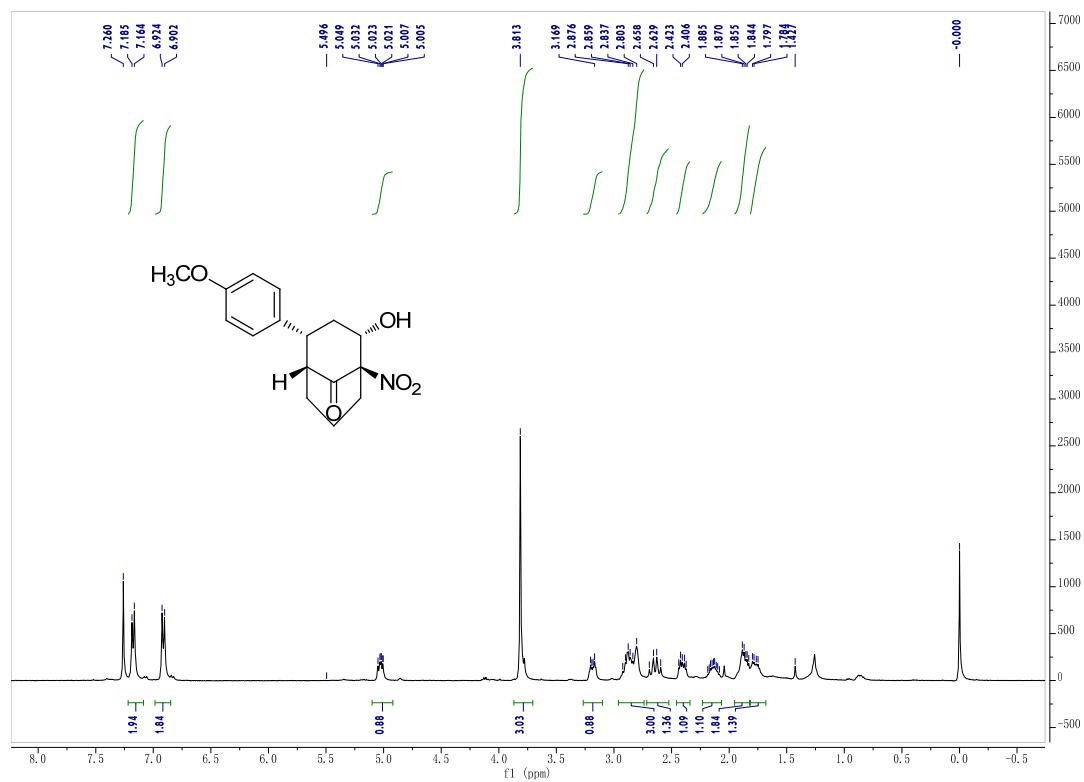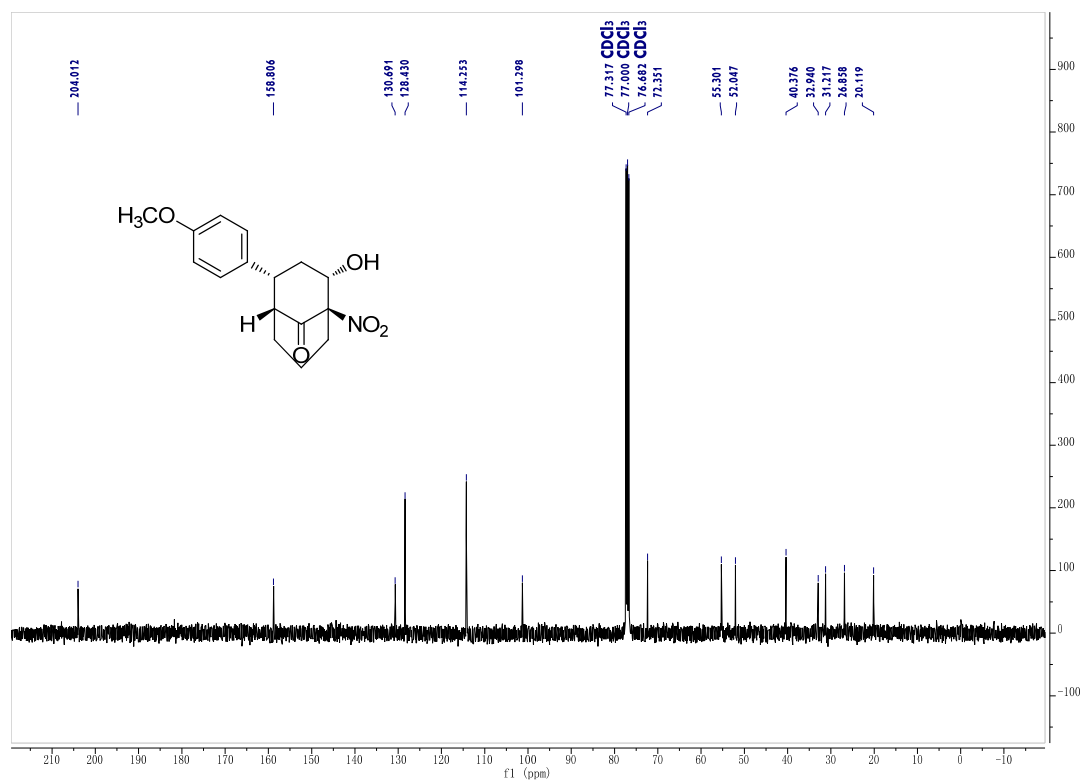



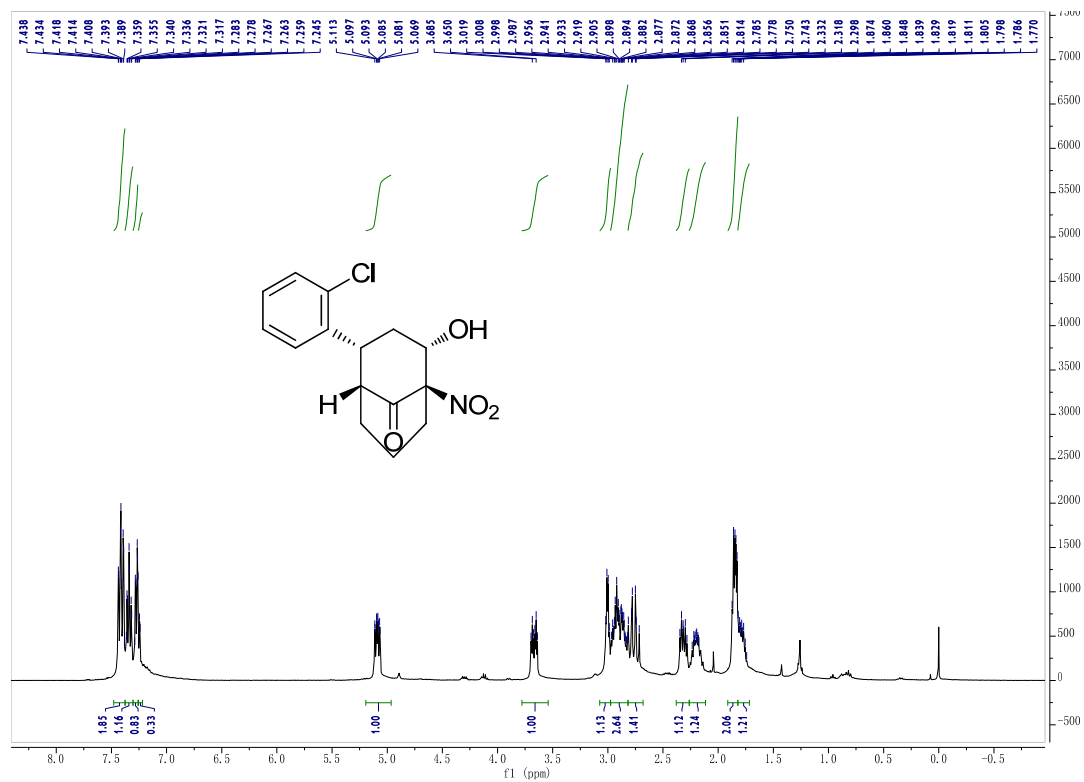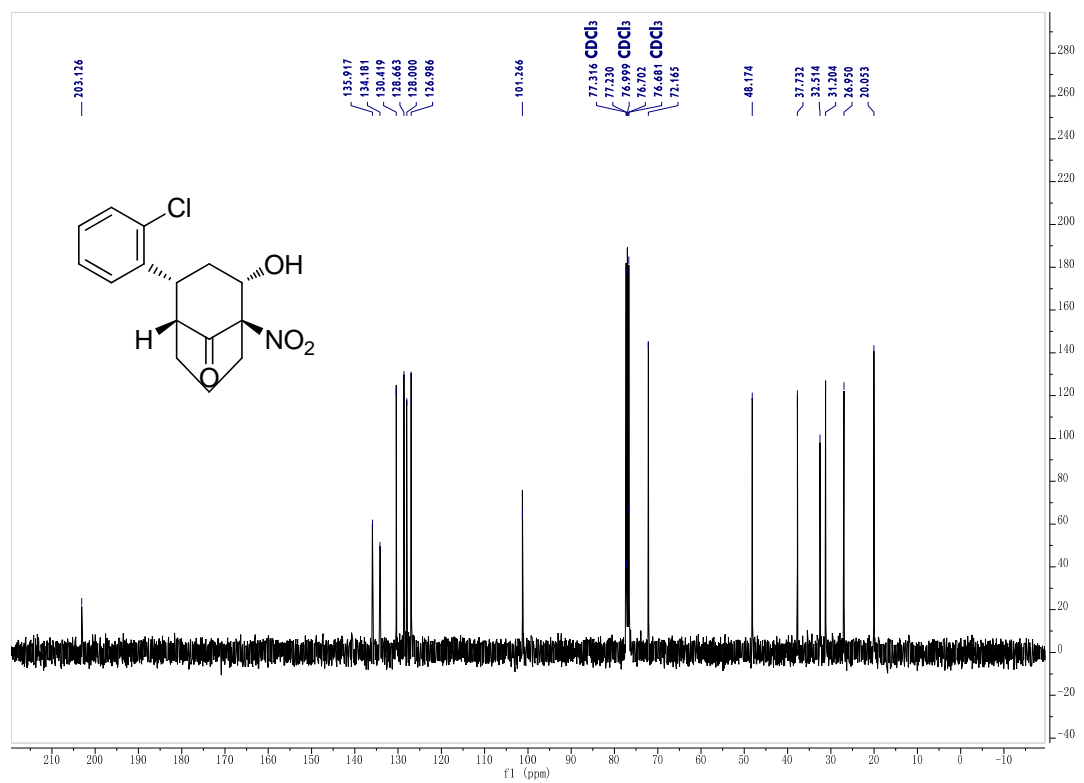

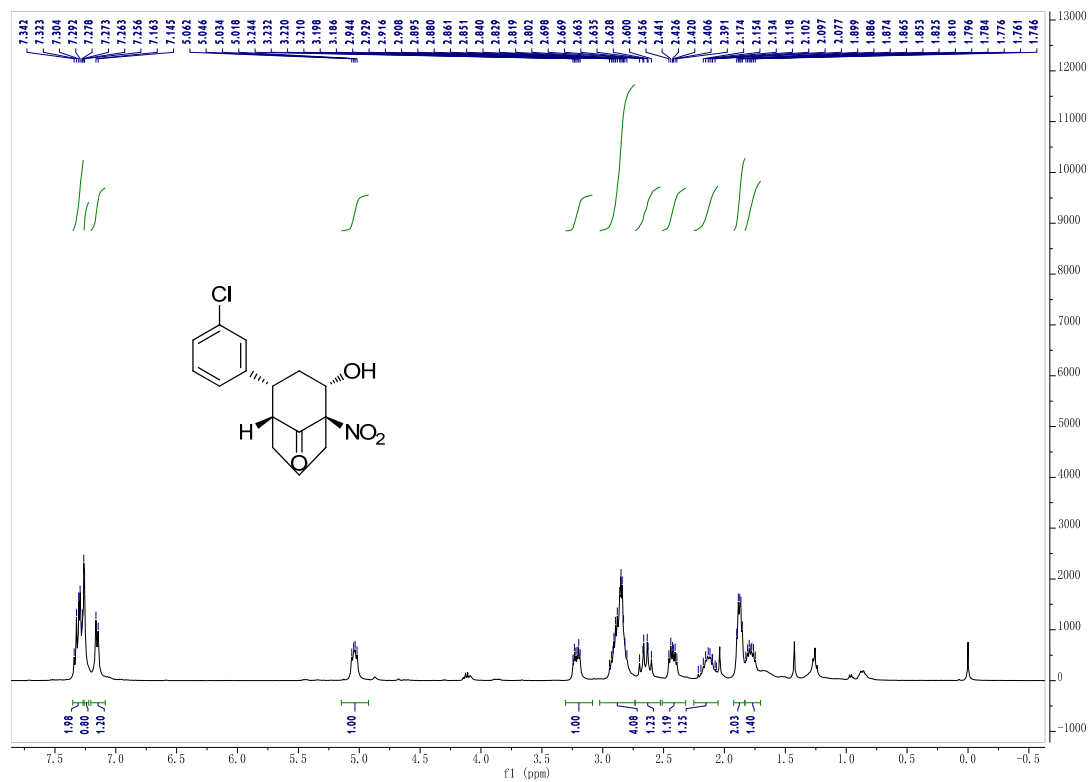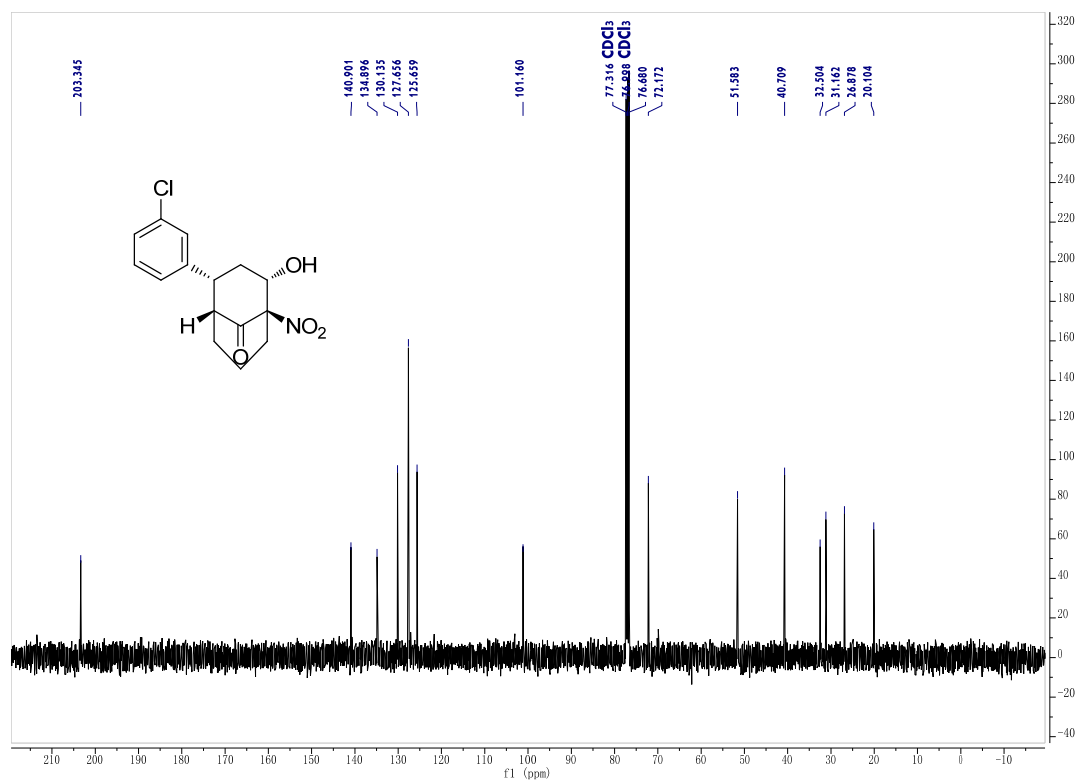

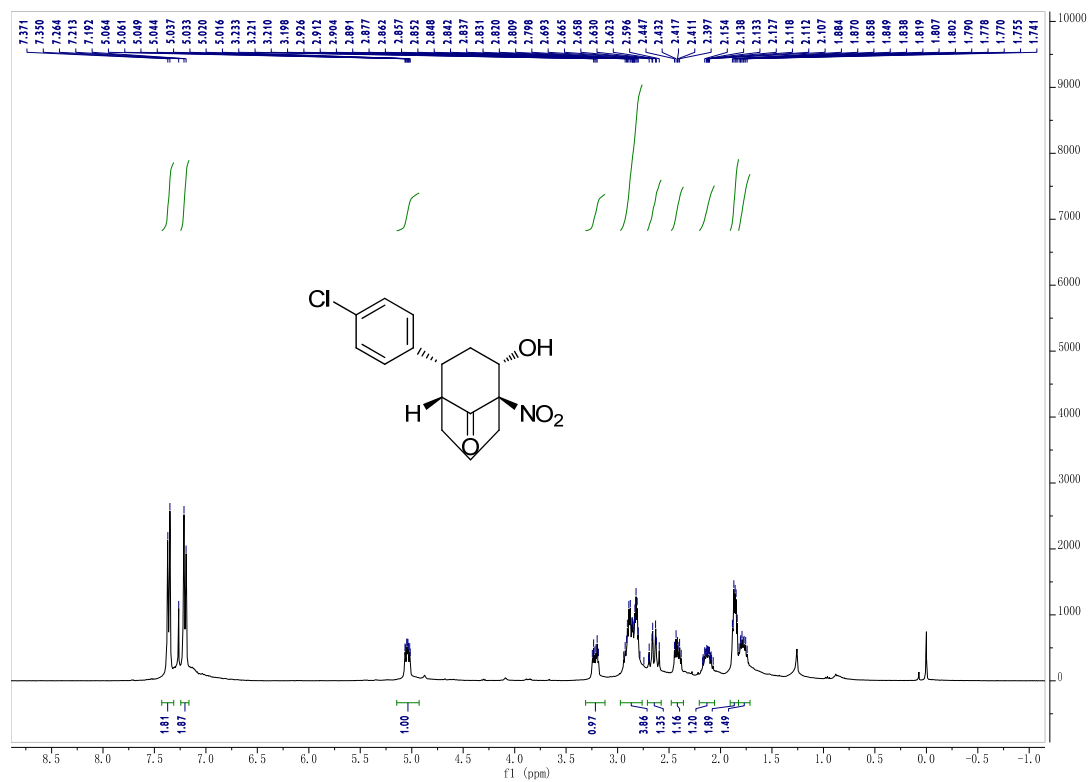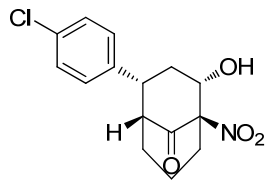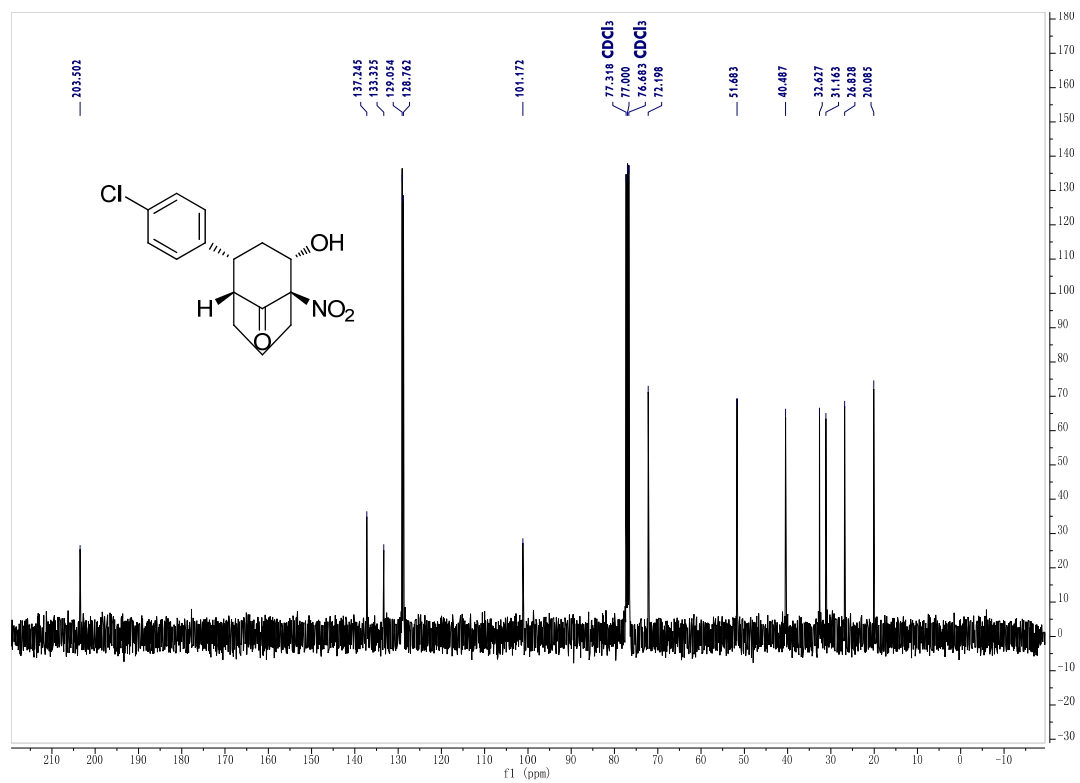

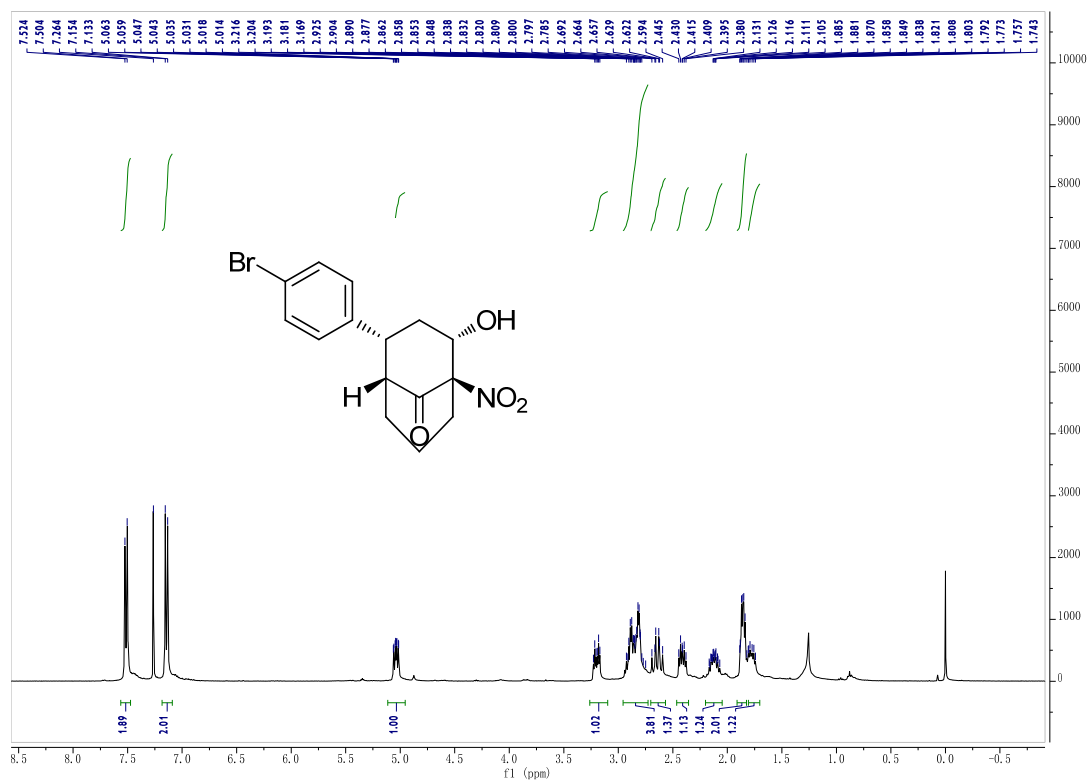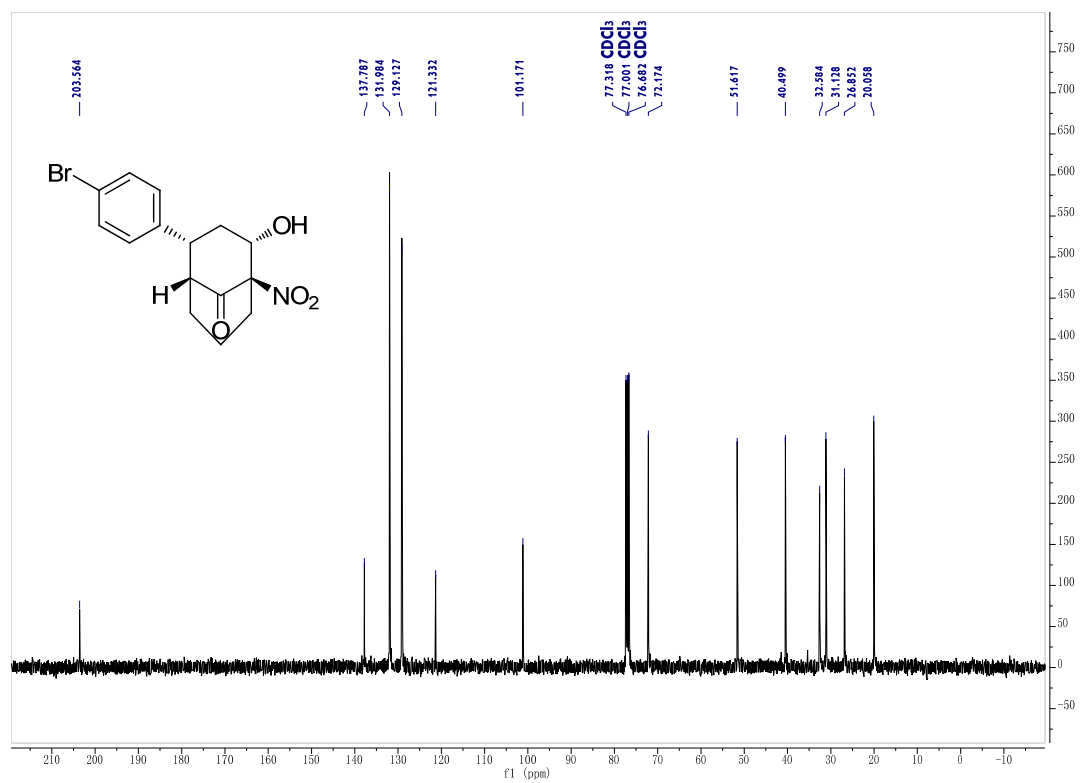

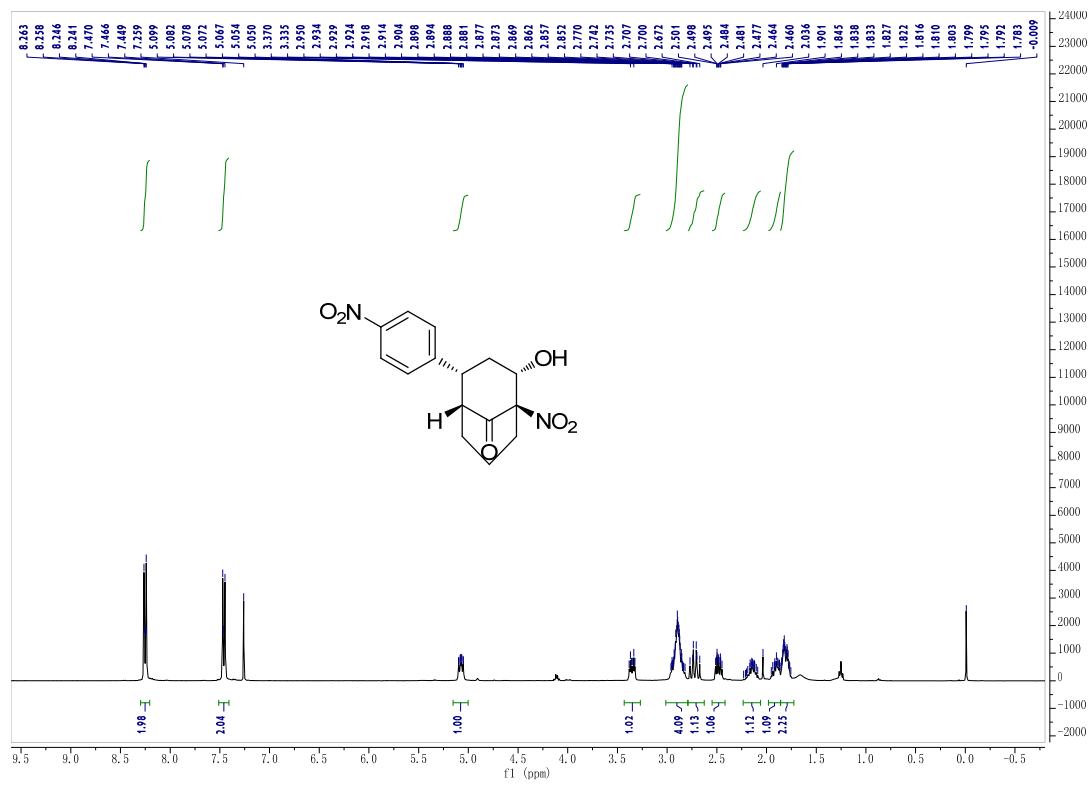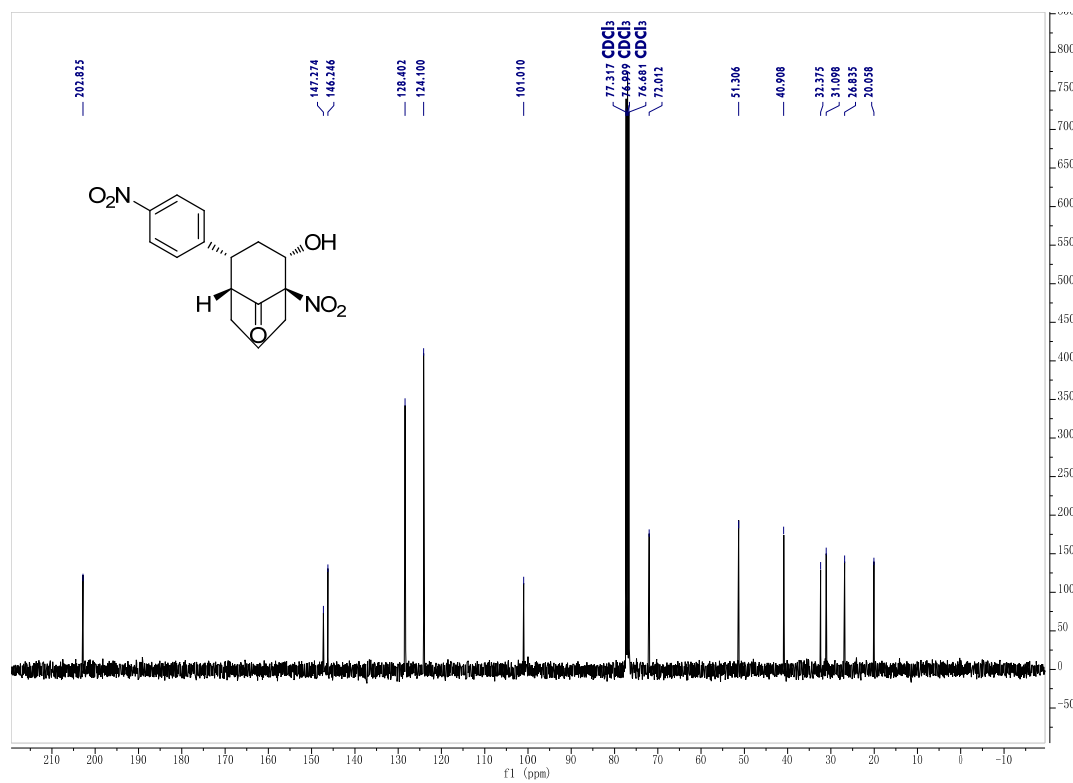

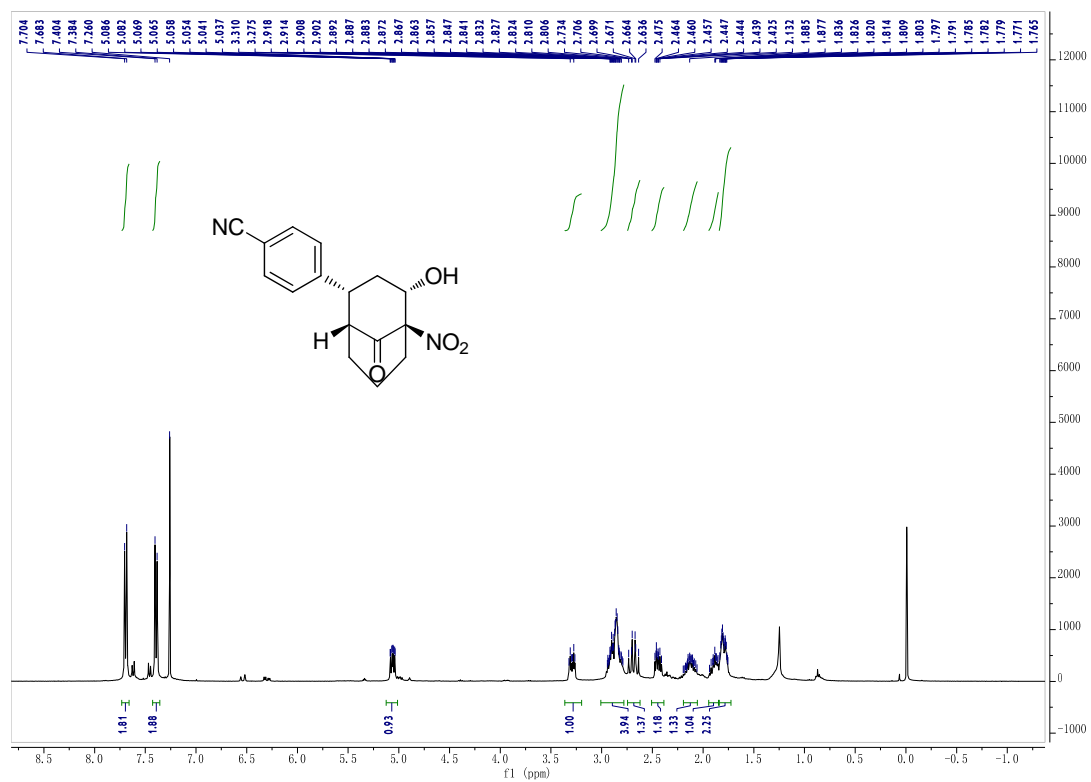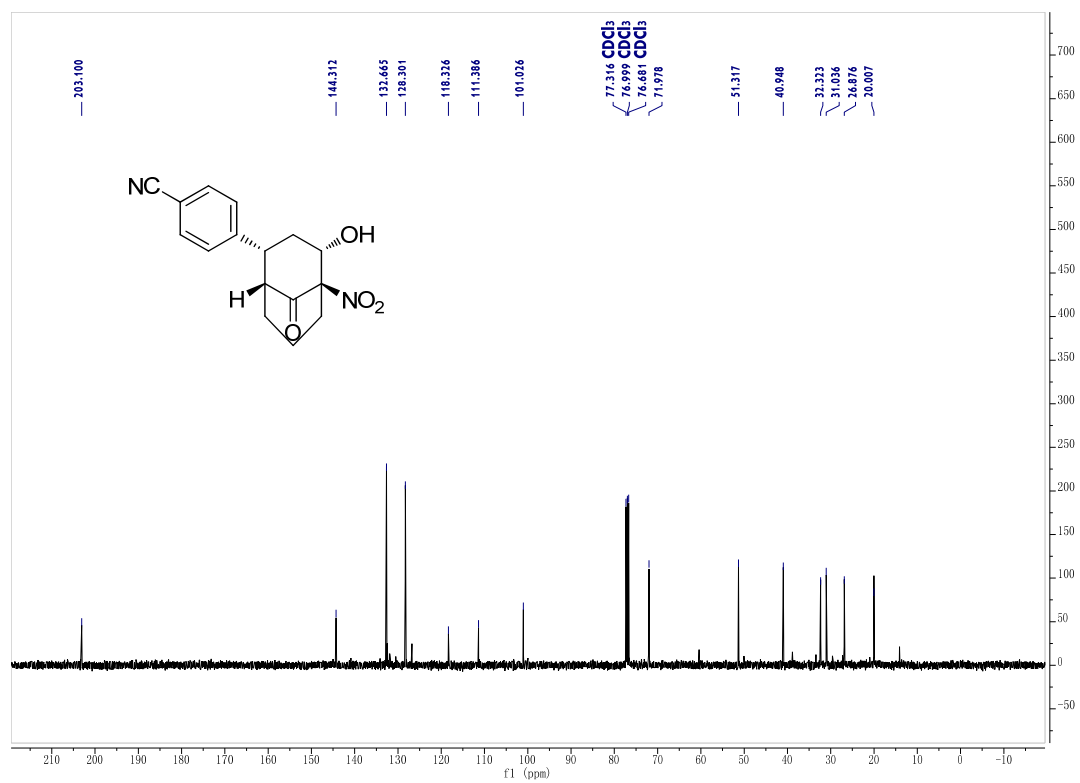



<sup>19</sup>F spectrum

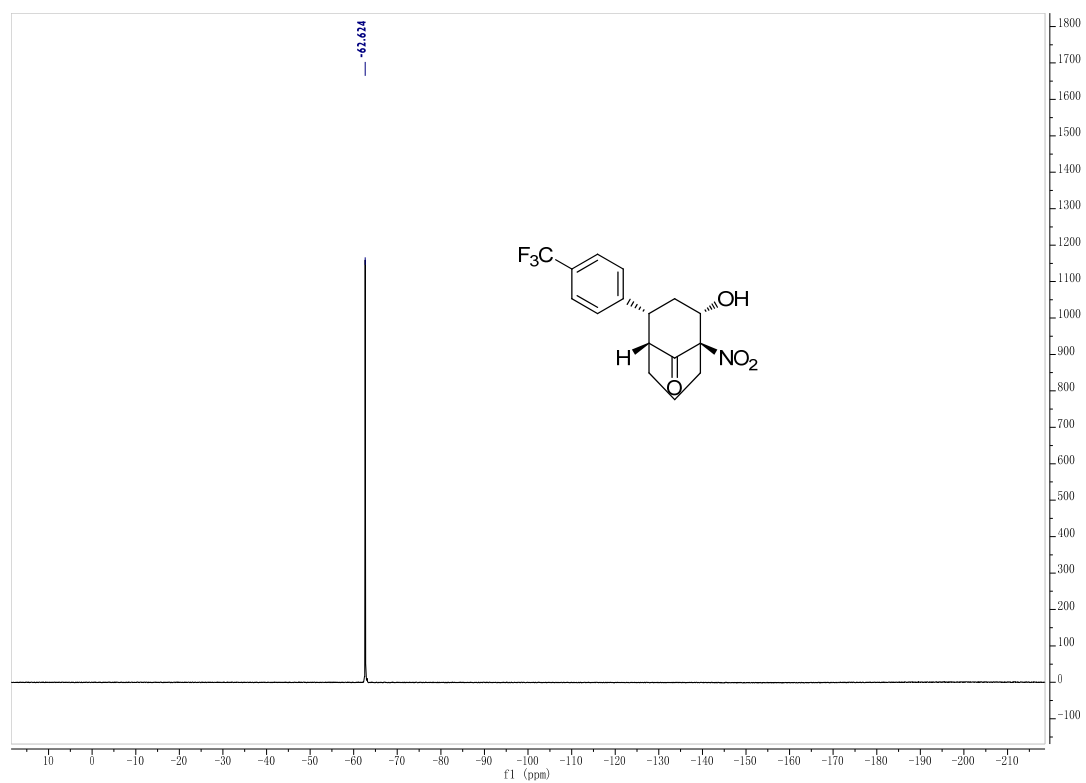



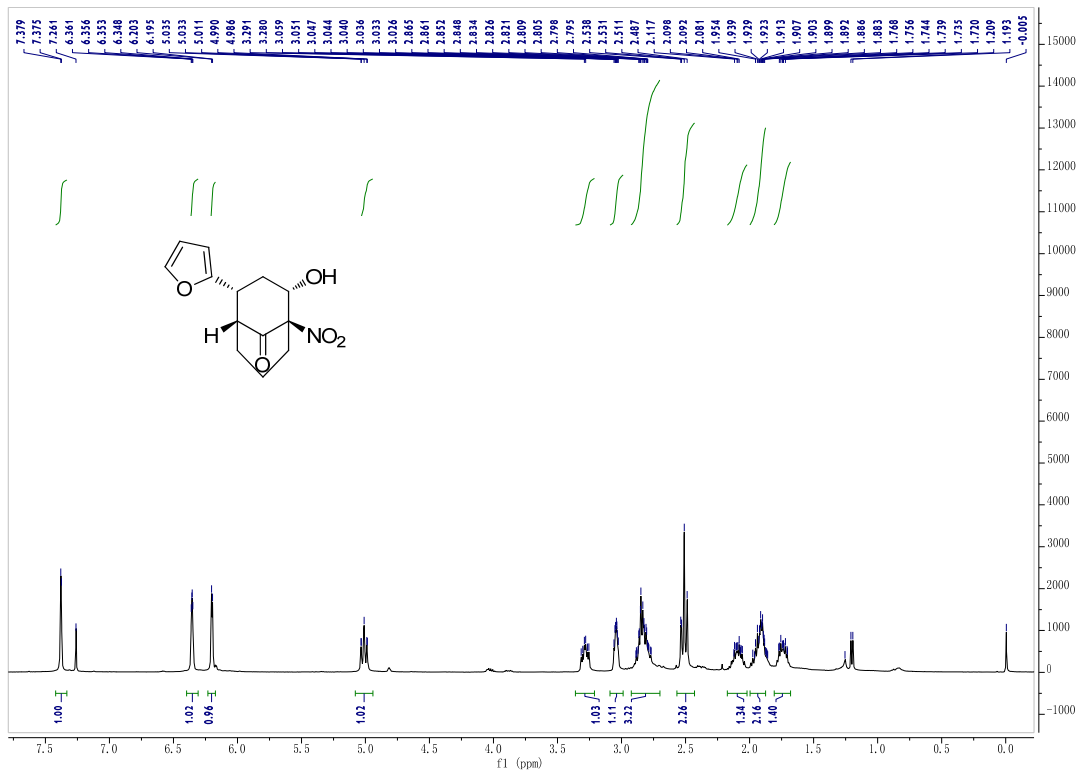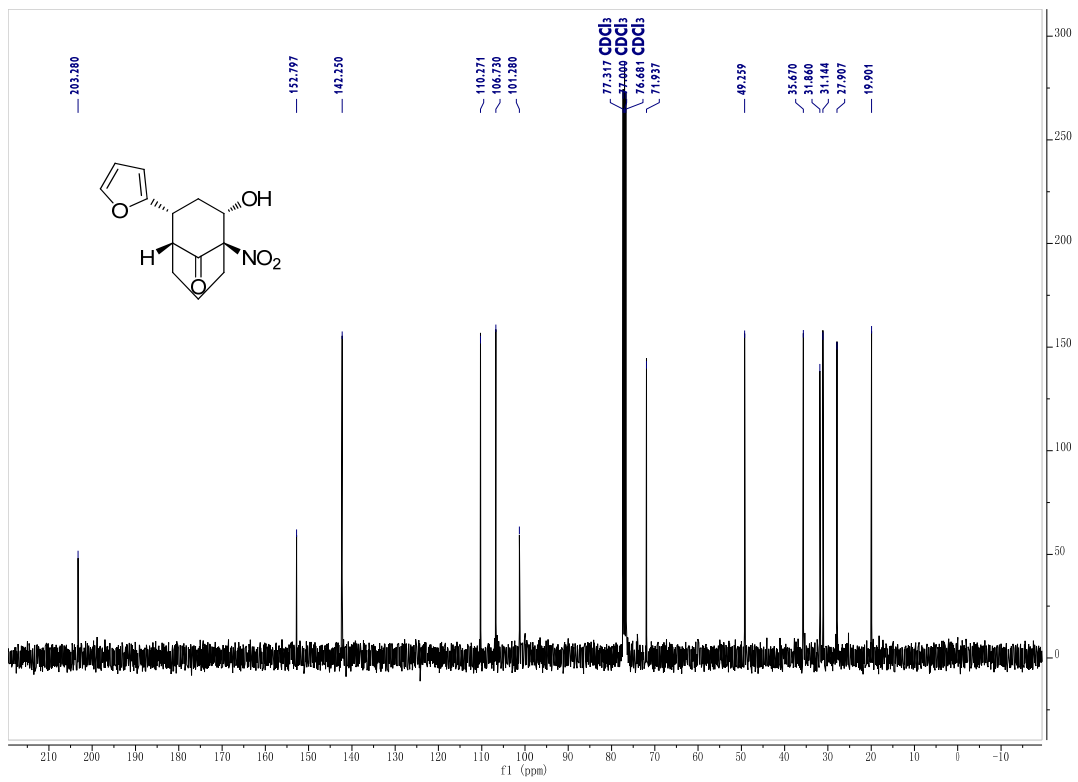

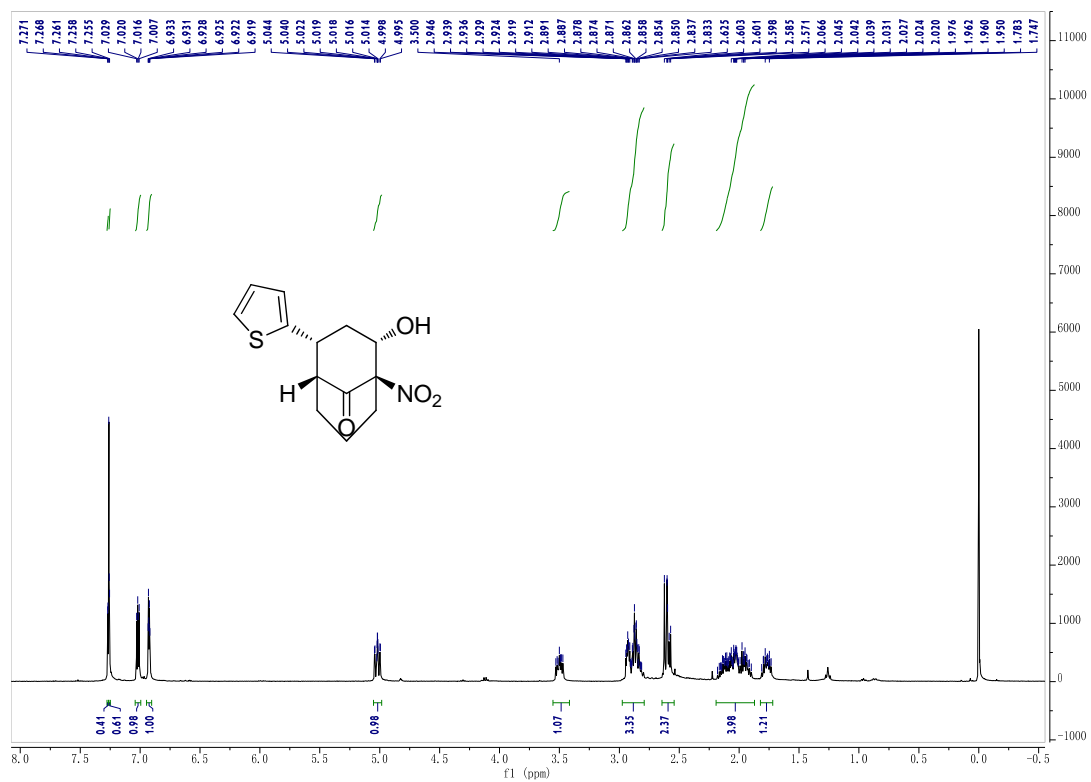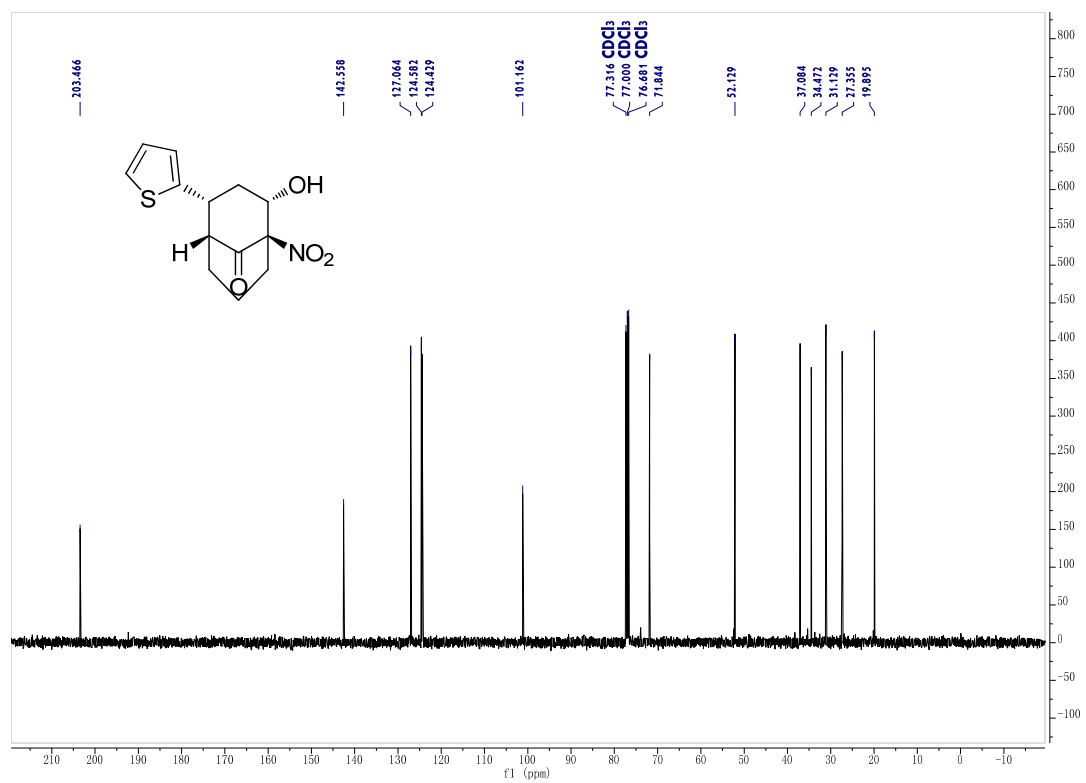

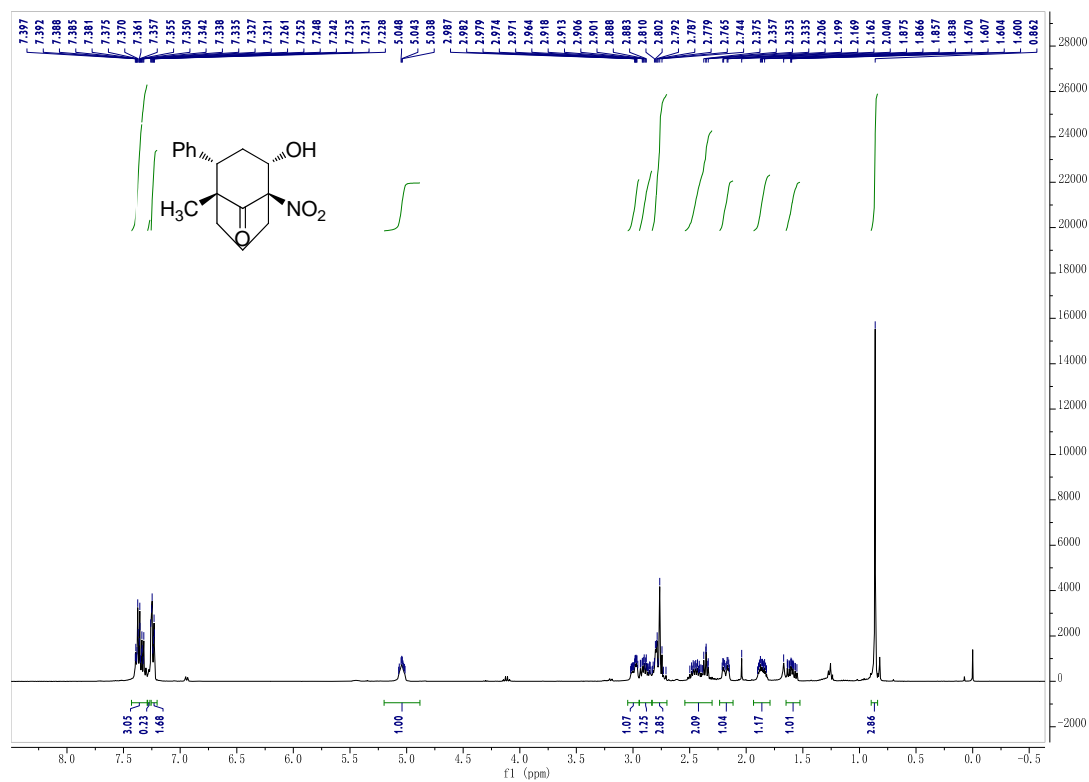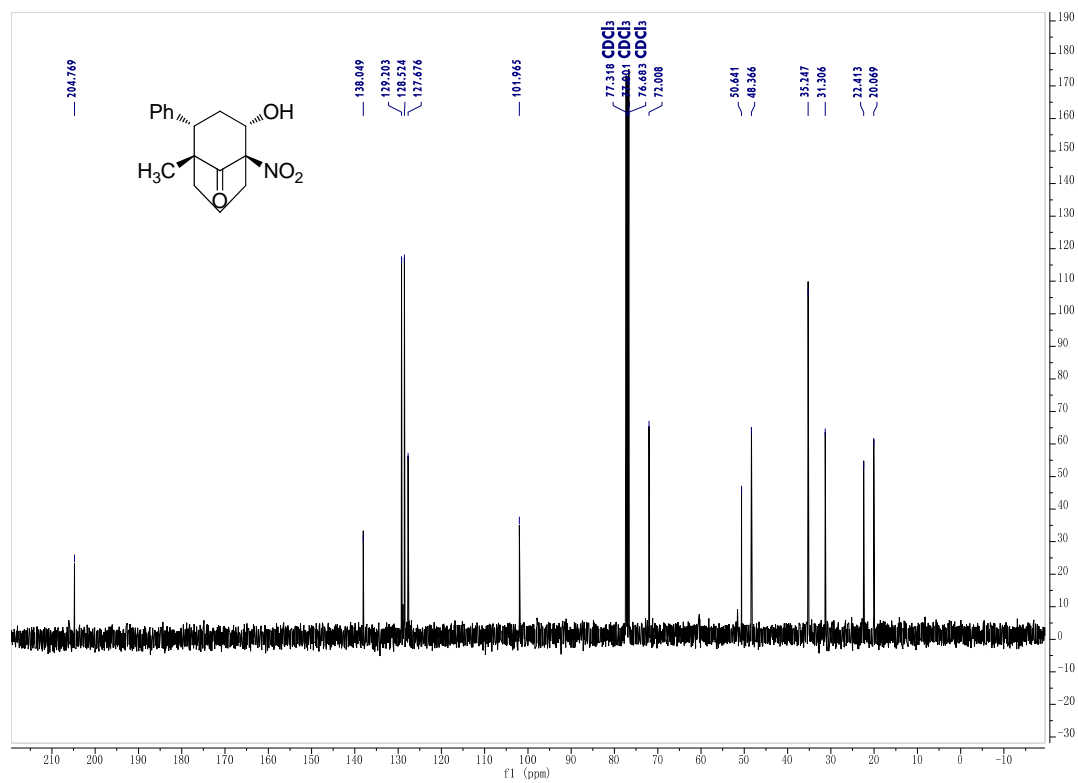

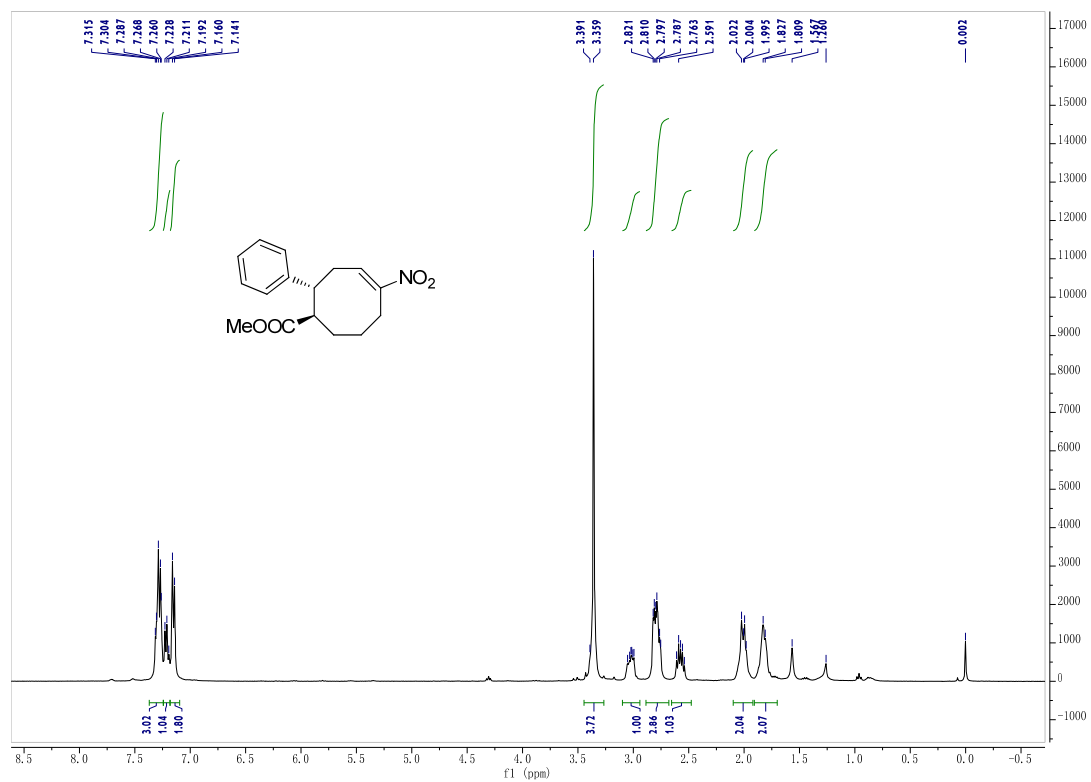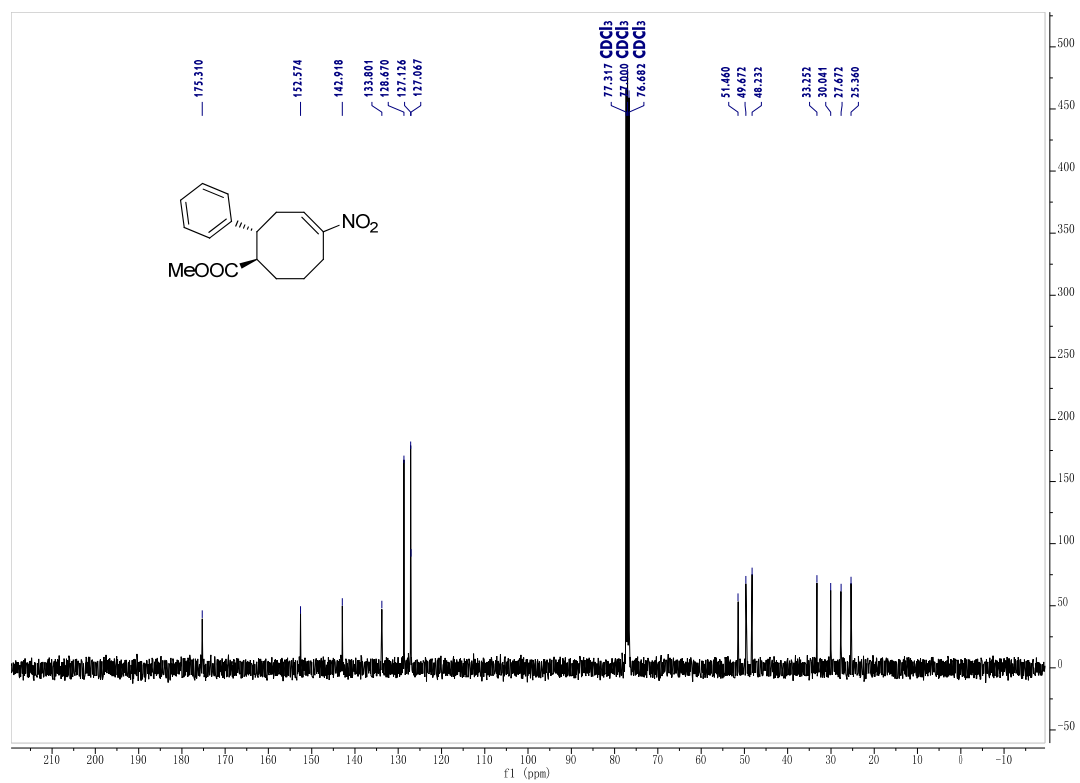

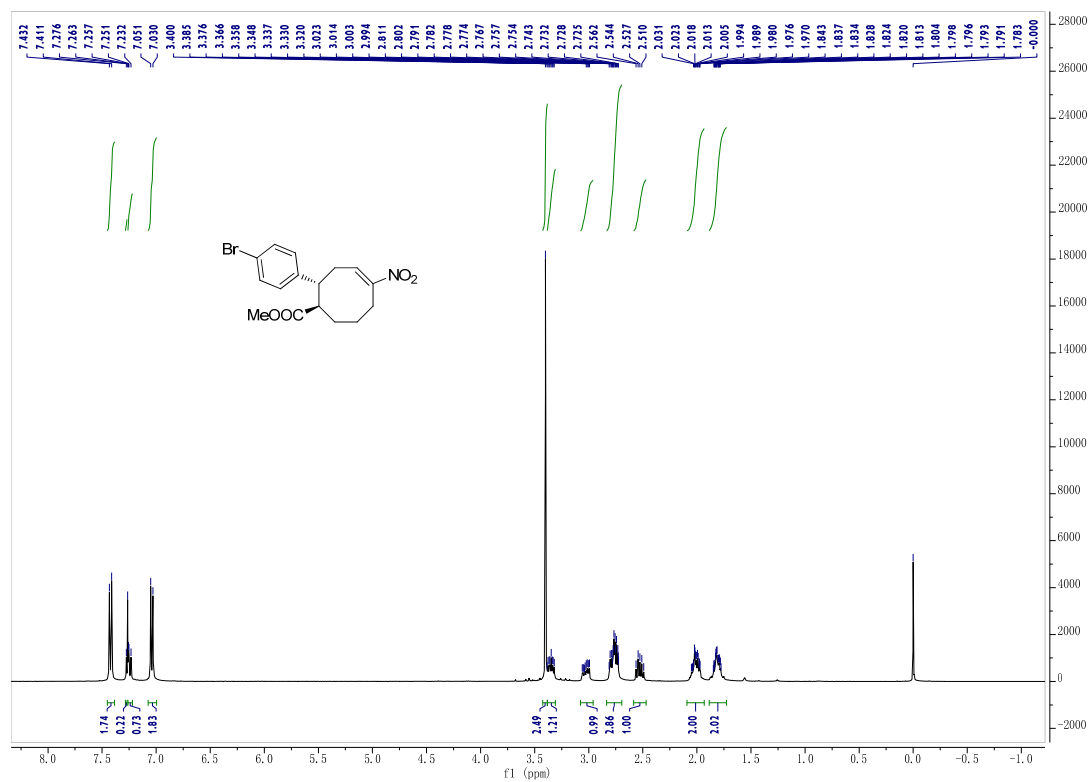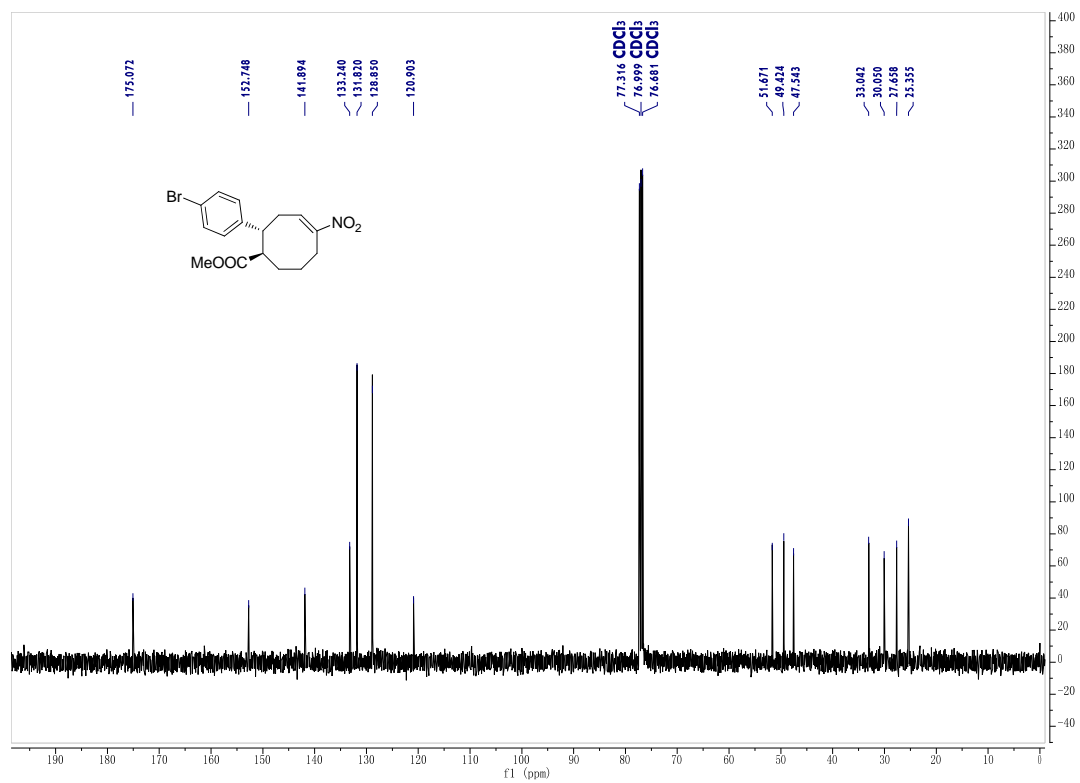

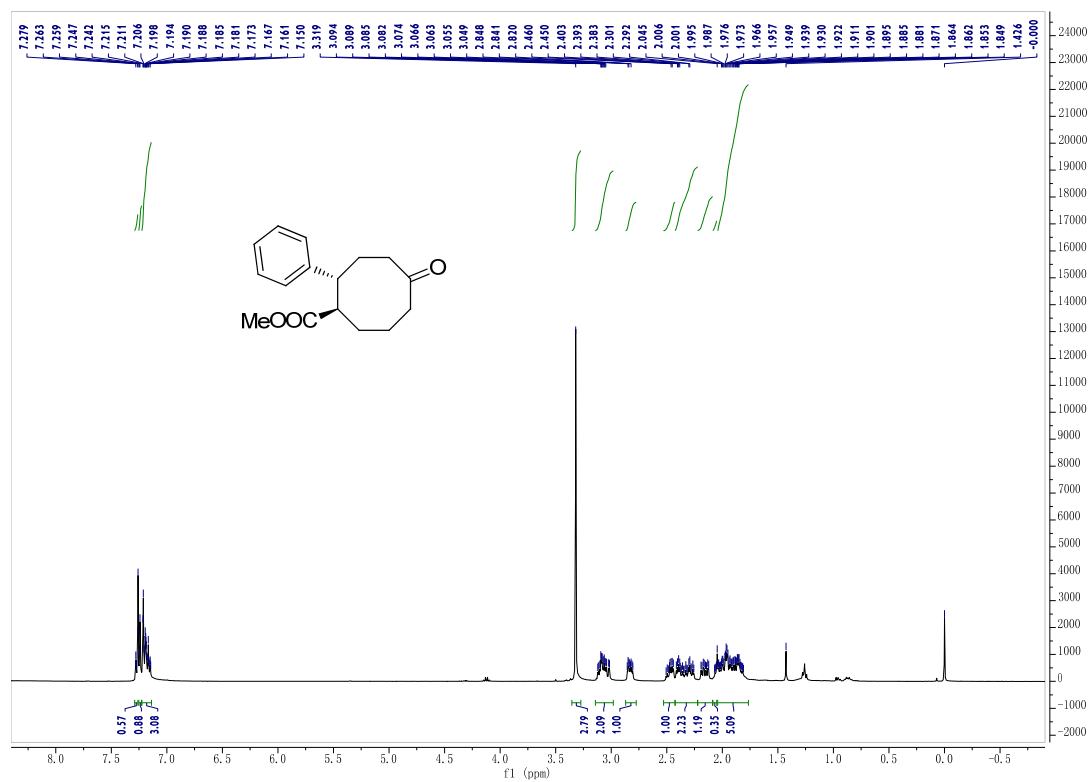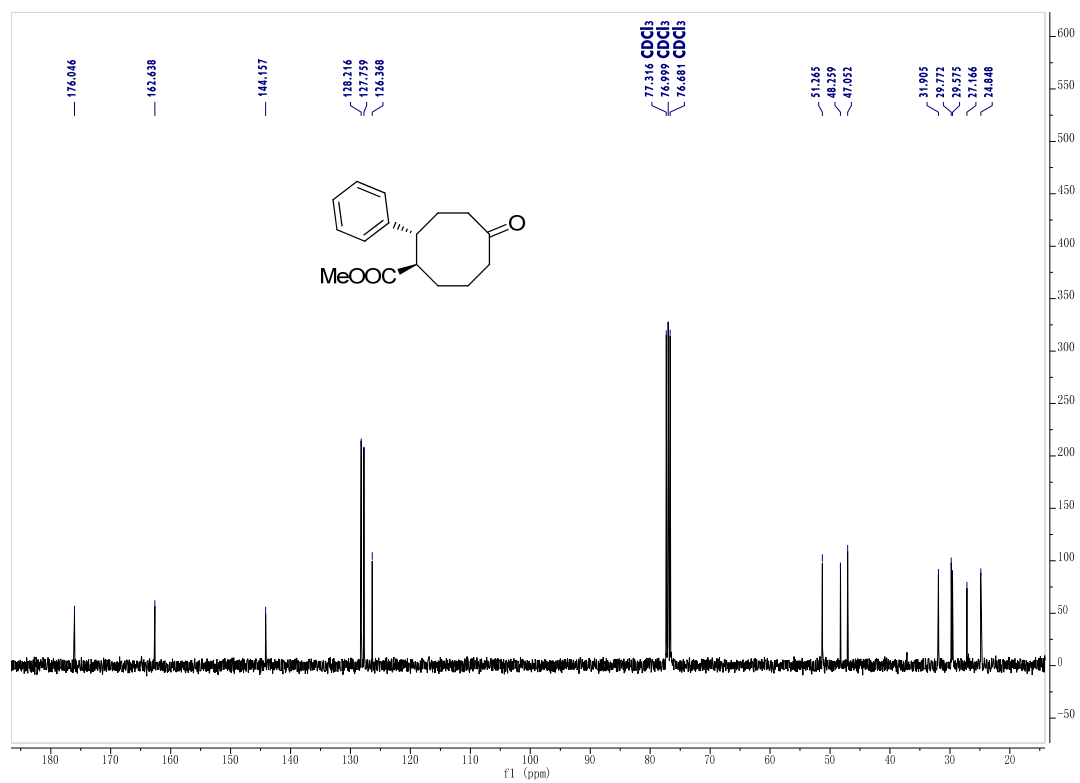

### Dept 90 spectrum

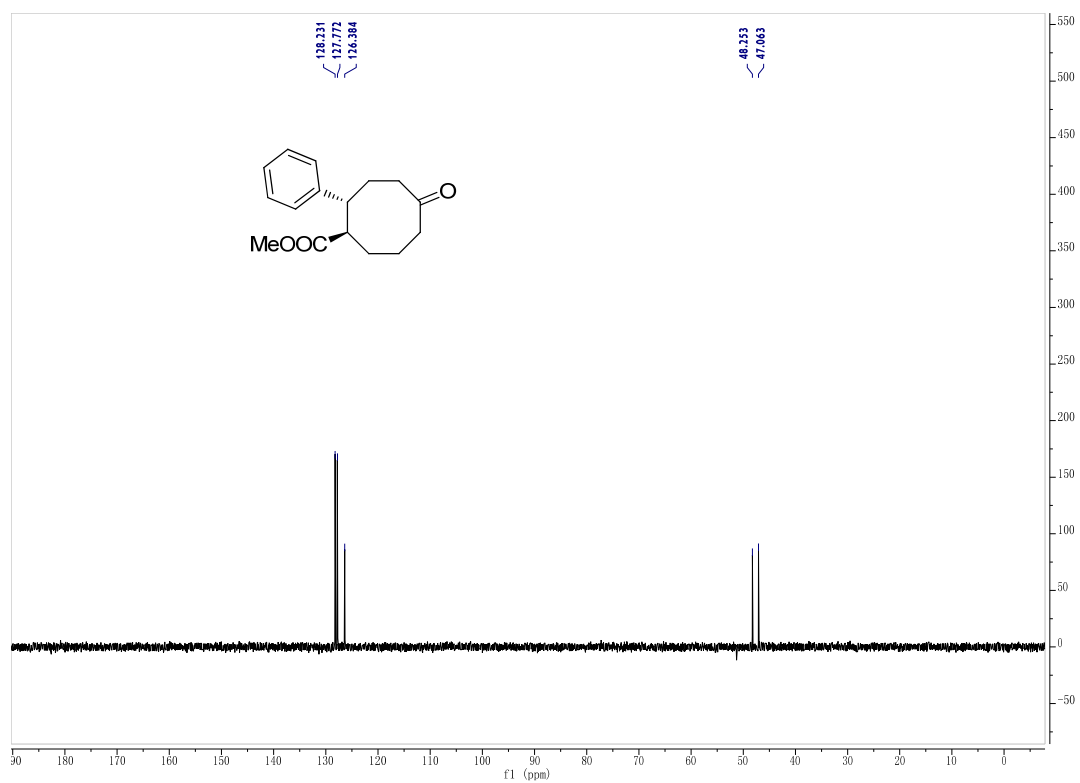

### Dept 135 spectrum

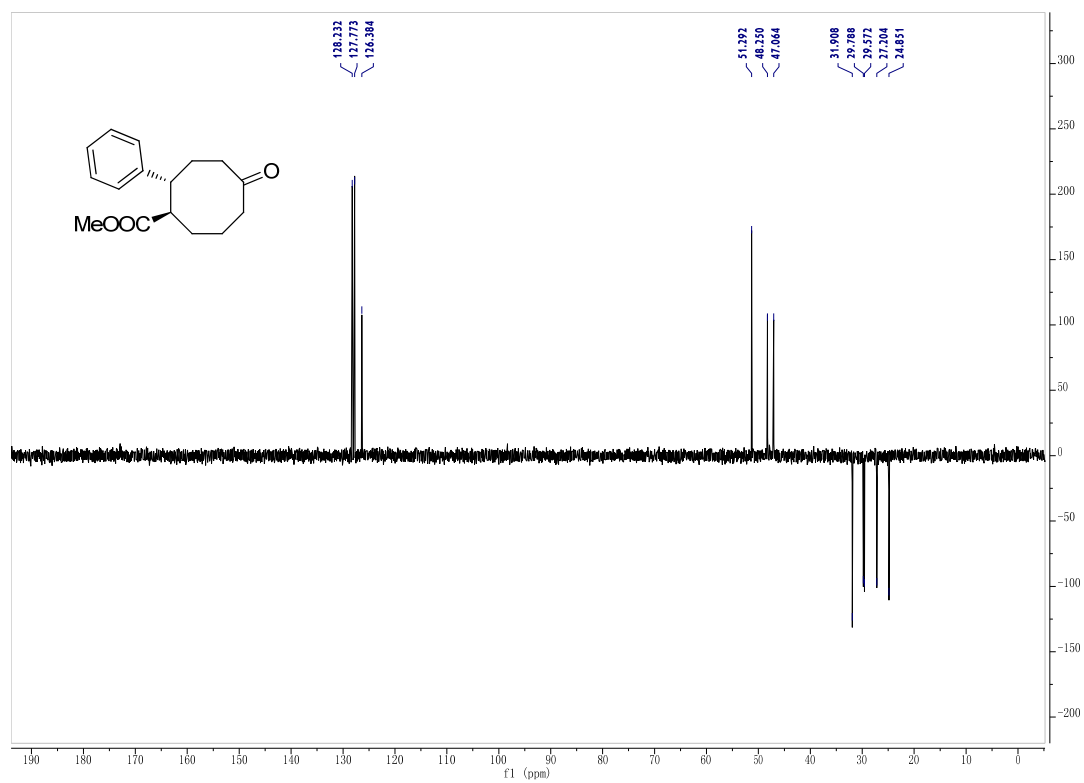

### (H) HPLC chromatogram

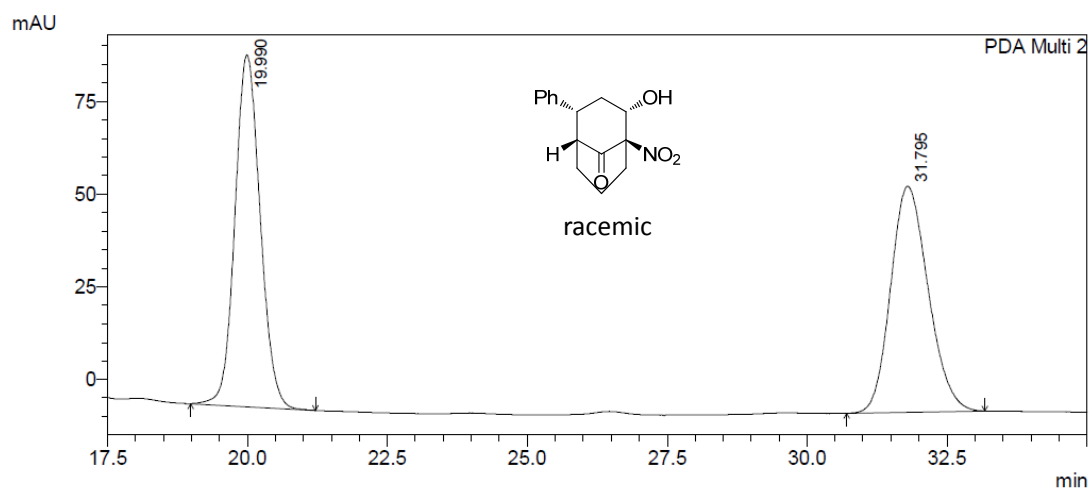

PeakTable

PDA Ch2 220nm 4nm

| Peak# | Ret. Time | Area    | Height | Area %  | Height % |
|-------|-----------|---------|--------|---------|----------|
| 1     | 19.990    | 2979531 | 94909  | 51.137  | 60.879   |
| 2     | 31.795    | 2847004 | 60988  | 48.863  | 39.121   |
| Total |           | 5826535 | 155897 | 100.000 | 100.000  |

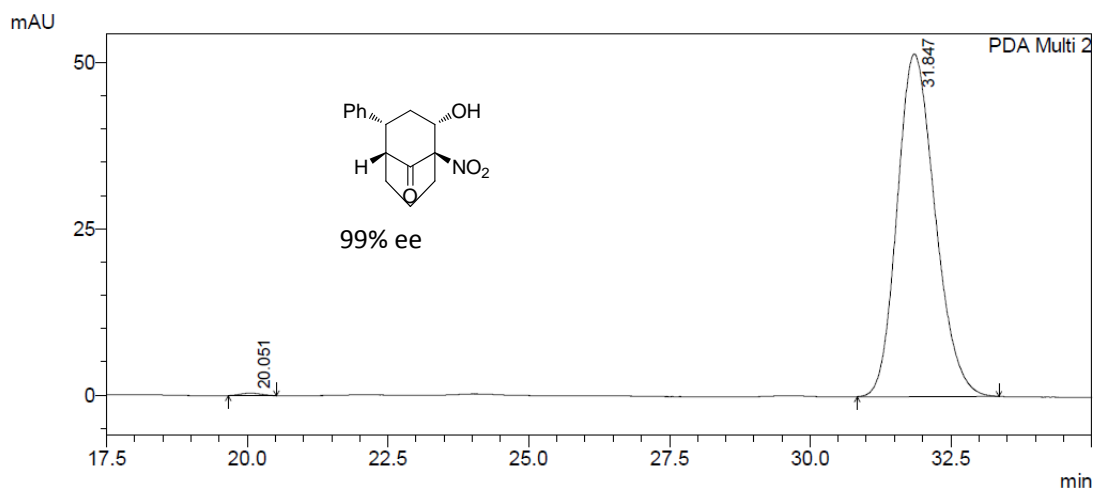

PeakTable

PDA Ch2 220nm 4nm

| Peak# | Ret. Time | Area    | Height | Area %  | Height % |
|-------|-----------|---------|--------|---------|----------|
| 1     | 20.051    | 10298   | 396    | 0.424   | 0.764    |
| 2     | 31.847    | 2416659 | 51496  | 99.576  | 99.236   |
| Total |           | 2426957 | 51893  | 100.000 | 100.000  |



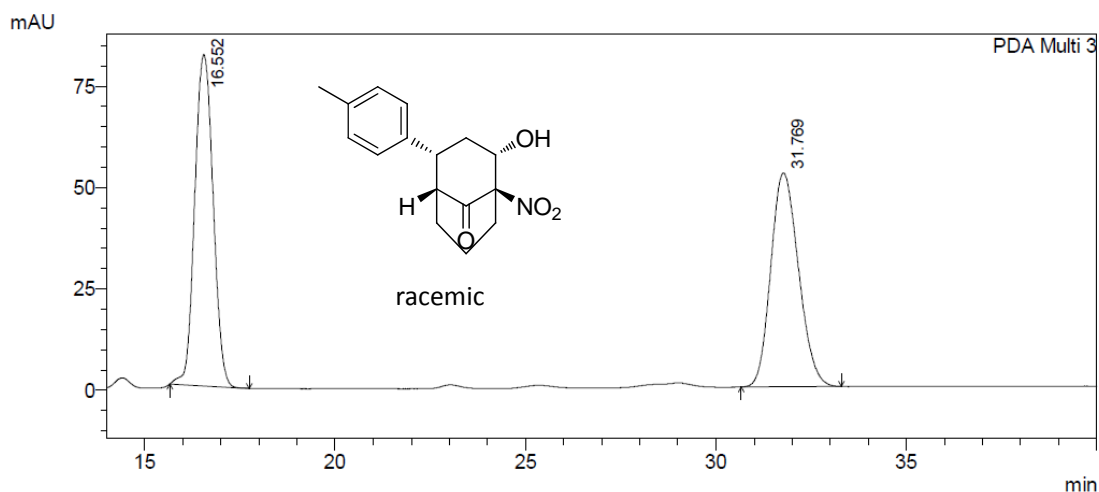

1 PDA Multi 3/230nm 4nm

PeakTable

PDA Ch3 230nm 4nm

| Peak# | Ret. Time | Area    | Height | Area %  | Height % |
|-------|-----------|---------|--------|---------|----------|
| 1     | 16.552    | 2746242 | 81720  | 50.683  | 60.784   |
| 2     | 31.769    | 2672242 | 52724  | 49.317  | 39.216   |
| Total |           | 5418485 | 134445 | 100.000 | 100.000  |

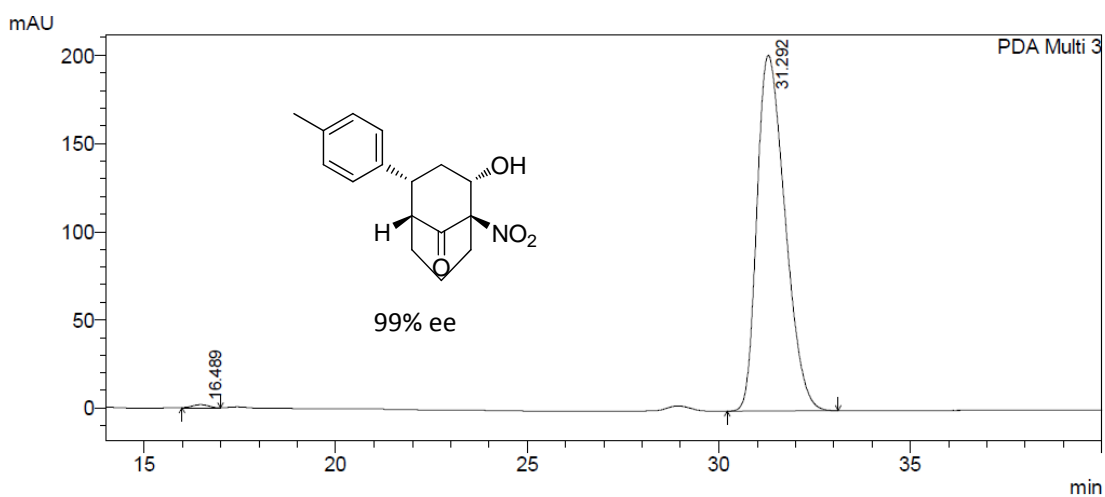

1 PDA Multi 3/230nm 4nm

PeakTable

PDA Ch3 230nm 4nm

| Peak# | Ret. Time | Area     | Height | Area %  | Height % |
|-------|-----------|----------|--------|---------|----------|
| 1     | 16.489    | 51615    | 1806   | 0.500   | 0.888    |
| 2     | 31.292    | 10279551 | 201622 | 99.500  | 99.112   |
| Total |           | 10331167 | 203427 | 100.000 | 100.000  |

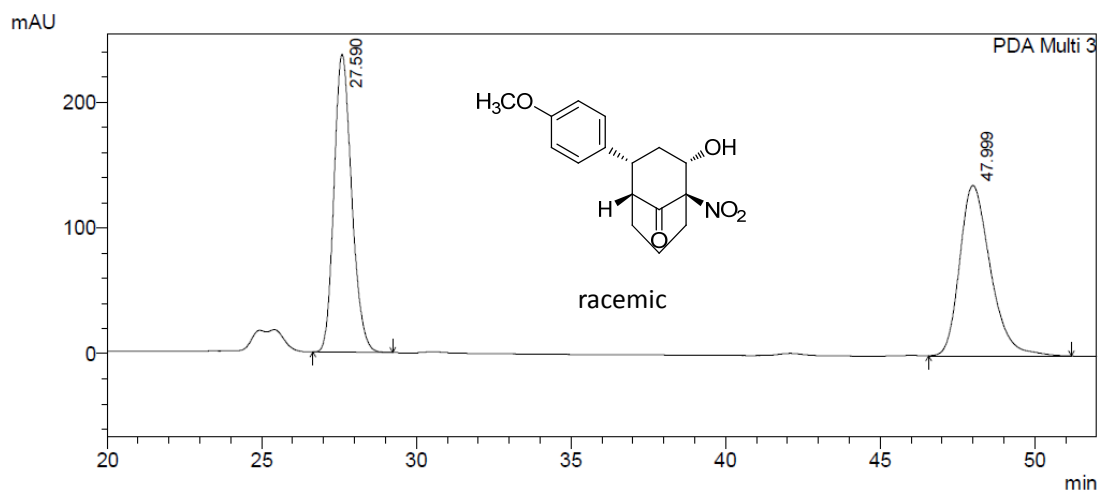

1 PDA Multi 3/230nm 4nm

PeakTable

PDA Ch3 230nm 4nm

| Peak# | Ret. Time | Area     | Height | Area %  | Height % |
|-------|-----------|----------|--------|---------|----------|
| 1     | 27.590    | 9468371  | 237180 | 50.182  | 63.635   |
| 2     | 47.999    | 9399630  | 135539 | 49.818  | 36.365   |
| Total |           | 18868001 | 372719 | 100.000 | 100.000  |

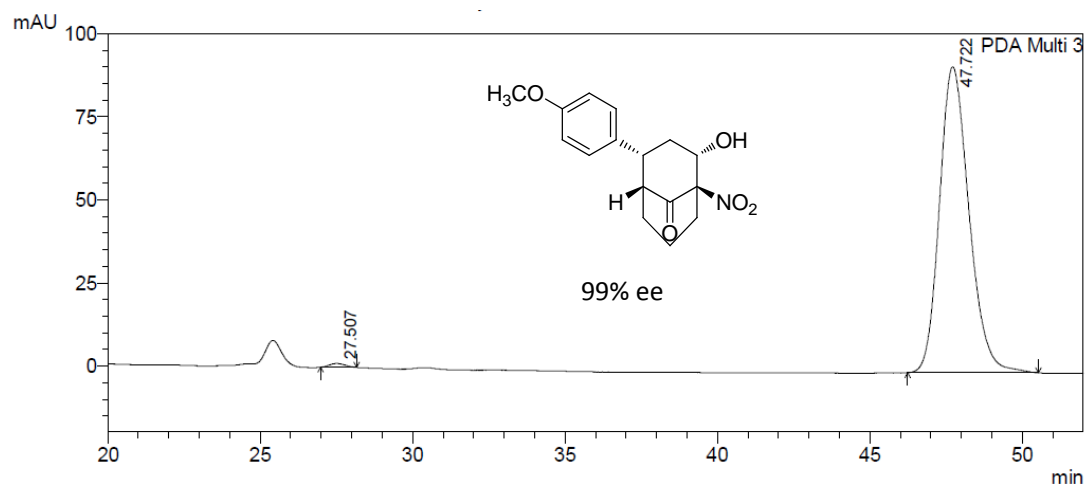

1 PDA Multi 3/230nm 4nm

PeakTable

PDA Ch3 230nm 4nm

| Peak# | Ret. Time | Area    | Height | Area %  | Height % |
|-------|-----------|---------|--------|---------|----------|
| 1     | 27.507    | 40418   | 1141   | 0.645   | 1.223    |
| 2     | 47.722    | 6226576 | 92152  | 99.355  | 98.777   |
| Total |           | 6266994 | 93294  | 100.000 | 100.000  |

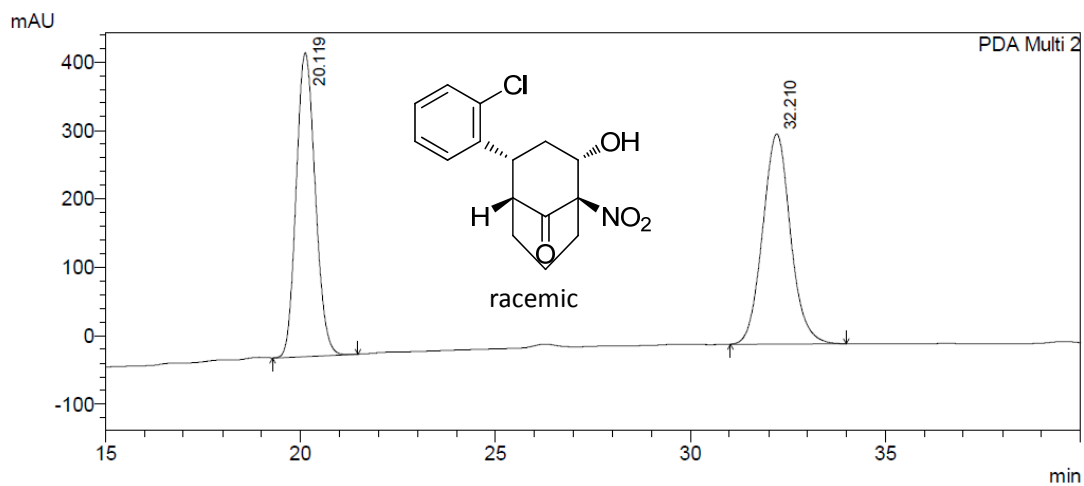

1 PDA Multi 2/220nm 4nm

PeakTable

PDA Ch2 220nm 4nm

| Peak# | Ret. Time | Area     | Height | Area %  | Height % |
|-------|-----------|----------|--------|---------|----------|
| 1     | 20.119    | 15058615 | 443708 | 49.694  | 59.111   |
| 2     | 32.210    | 15244168 | 306924 | 50.306  | 40.889   |
| Total |           | 30302783 | 750631 | 100.000 | 100.000  |

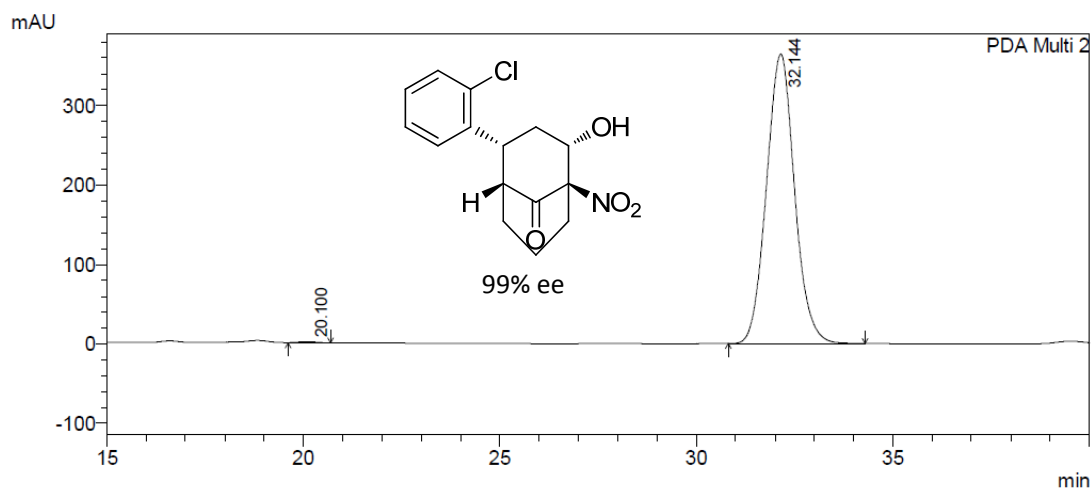

1 PDA Multi 2/220nm 4nm

PeakTable

PDA Ch2 220nm 4nm

| Peak# | Ret. Time | Area     | Height | Area %  | Height % |
|-------|-----------|----------|--------|---------|----------|
| 1     | 20.100    | 42731    | 1407   | 0.235   | 0.385    |
| 2     | 32.144    | 18136069 | 364487 | 99.765  | 99.615   |
| Total |           | 18178801 | 365895 | 100.000 | 100.000  |

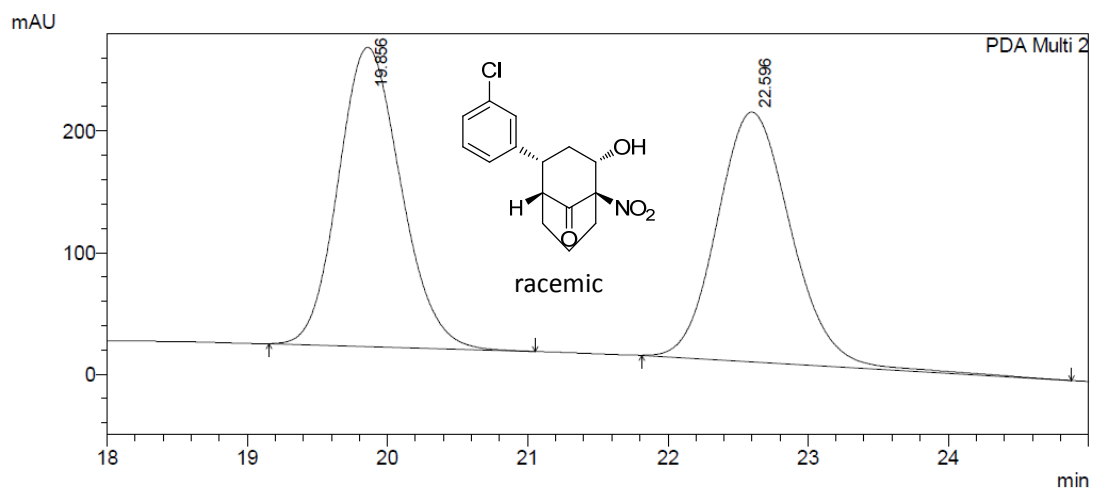

1 PDA Multi 2/220nm 4nm

PeakTable

PDA Ch2 220nm 4nm

| Peak# | Ret. Time | Area     | Height | Area %  | Height % |
|-------|-----------|----------|--------|---------|----------|
| 1     | 19.856    | 7651067  | 246040 | 50.306  | 54.517   |
| 2     | 22.596    | 7557944  | 205265 | 49.694  | 45.483   |
| Total |           | 15209011 | 451305 | 100.000 | 100.000  |

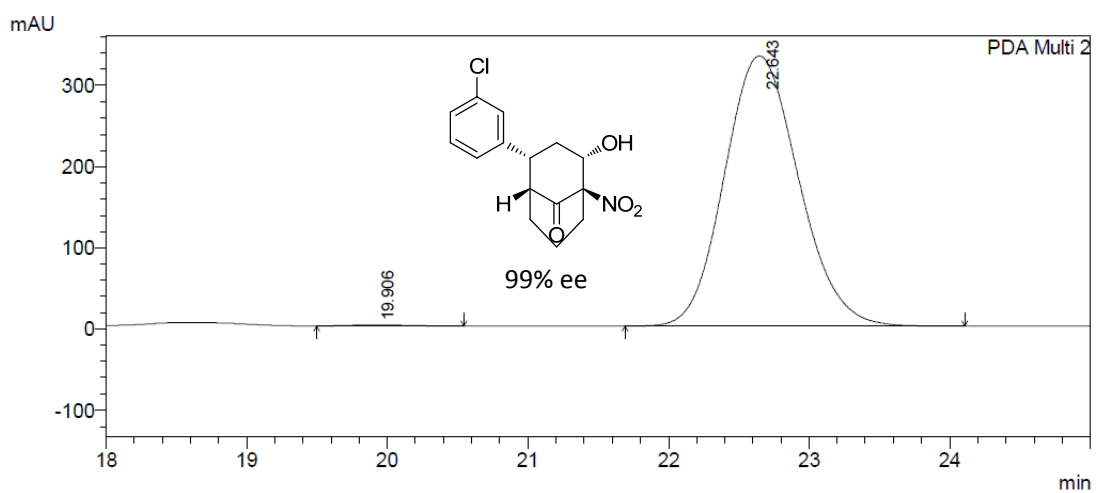

1 PDA Multi 2/220nm 4nm

PeakTable

PDA Ch2 220nm 4nm

| Peak# | Ret. Time | Area     | Height | Area %  | Height % |
|-------|-----------|----------|--------|---------|----------|
| 1     | 19.906    | 42510    | 1482   | 0.346   | 0.443    |
| 2     | 22.643    | 12231349 | 332966 | 99.654  | 99.557   |
| Total |           | 12273859 | 334448 | 100.000 | 100.000  |

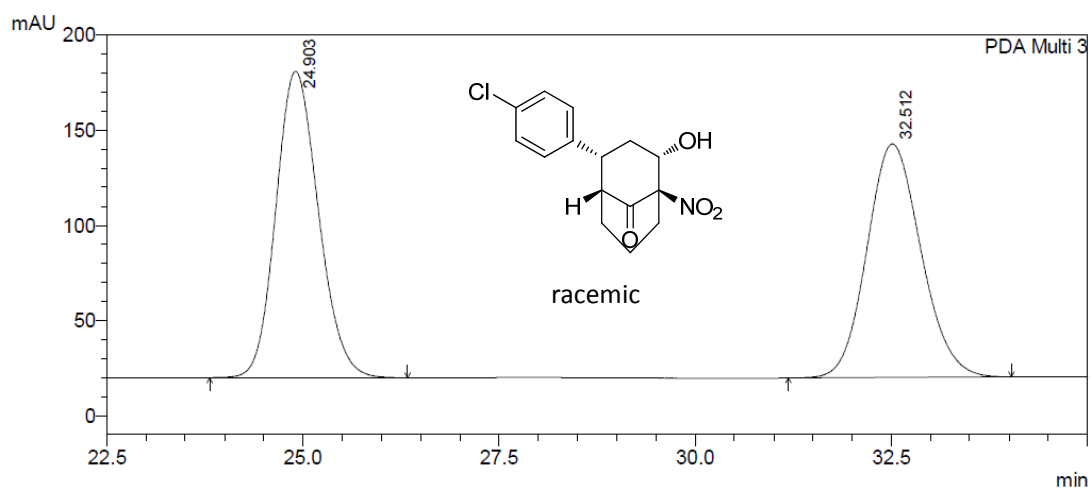

1 PDA Multi 3/230nm 4nm

PeakTable

PDA Ch3 230nm 4nm

| Peak# | Ret. Time | Area     | Height | Area %  | Height % |
|-------|-----------|----------|--------|---------|----------|
| 1     | 24.903    | 6097521  | 160967 | 50.874  | 56.752   |
| 2     | 32.512    | 5887942  | 122665 | 49.126  | 43.248   |
| Total |           | 11985463 | 283631 | 100.000 | 100.000  |

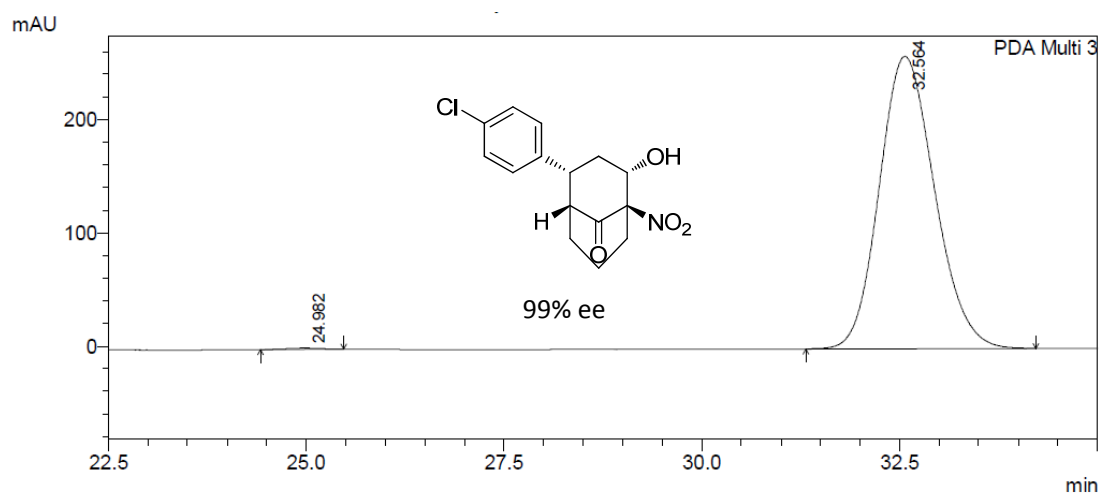

1 PDA Multi 3/230nm 4nm

PeakTable

PDA Ch3 230nm 4nm

| Peak# | Ret. Time | Area     | Height | Area %  | Height % |
|-------|-----------|----------|--------|---------|----------|
| 1     | 24.982    | 33199    | 1099   | 0.263   | 0.424    |
| 2     | 32.564    | 12572322 | 258104 | 99.737  | 99.576   |
| Total |           | 12605521 | 259203 | 100.000 | 100.000  |

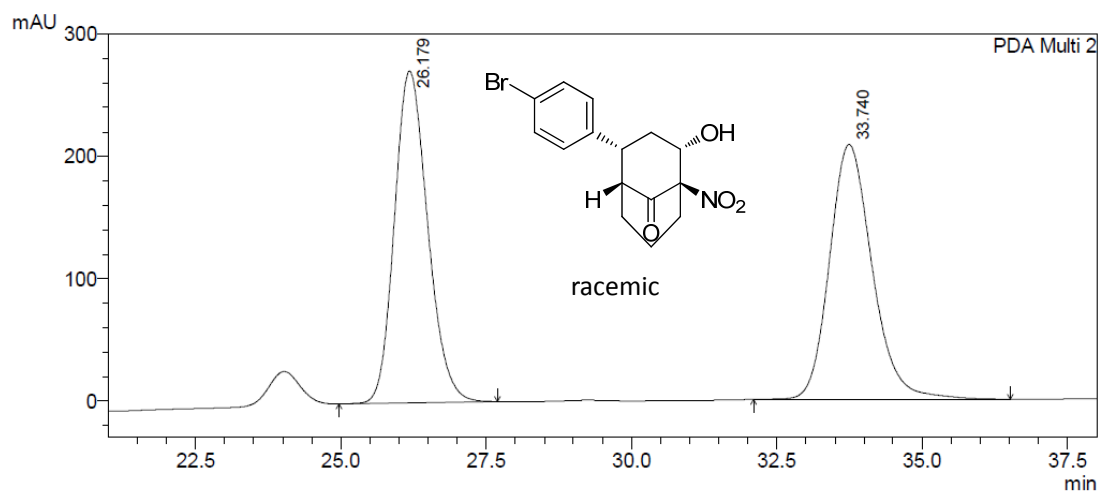

1 PDA Multi 2/220nm 4nm

PeakTable

PDA Ch2 220nm 4nm

| Peak# | Ret. Time | Area     | Height | Area %  | Height % |
|-------|-----------|----------|--------|---------|----------|
| 1     | 26.179    | 10806832 | 271325 | 50.314  | 56.568   |
| 2     | 33.740    | 10671816 | 208322 | 49.686  | 43.432   |
| Total |           | 21478649 | 479646 | 100.000 | 100.000  |

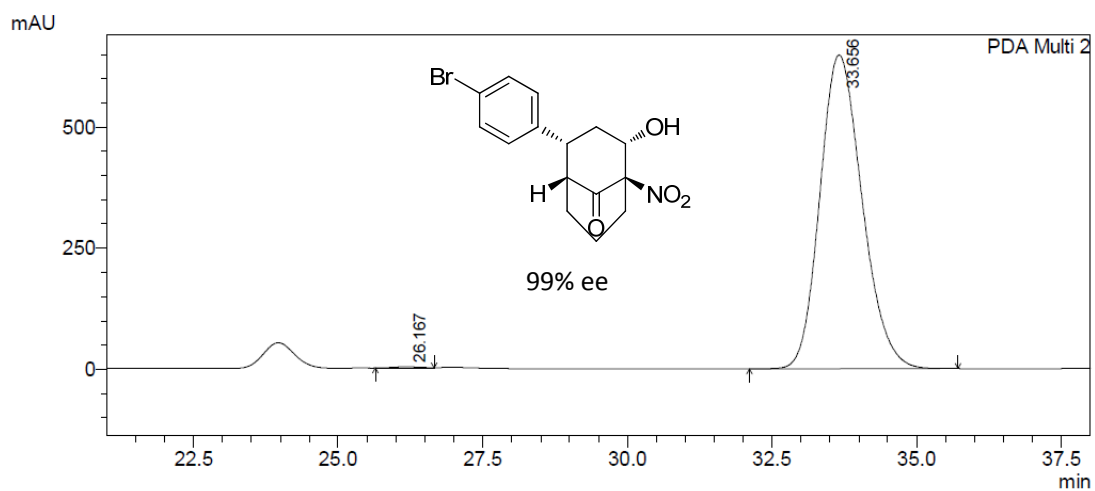

1 PDA Multi 2/220nm 4nm

PeakTable

PDA Ch2 220nm 4nm

| Peak# | Ret. Time | Area     | Height | Area %  | Height % |
|-------|-----------|----------|--------|---------|----------|
| 1     | 26.167    | 65254    | 2244   | 0.198   | 0.345    |
| 2     | 33.656    | 32972173 | 648673 | 99.802  | 99.655   |
| Total |           | 33037426 | 650917 | 100.000 | 100.000  |

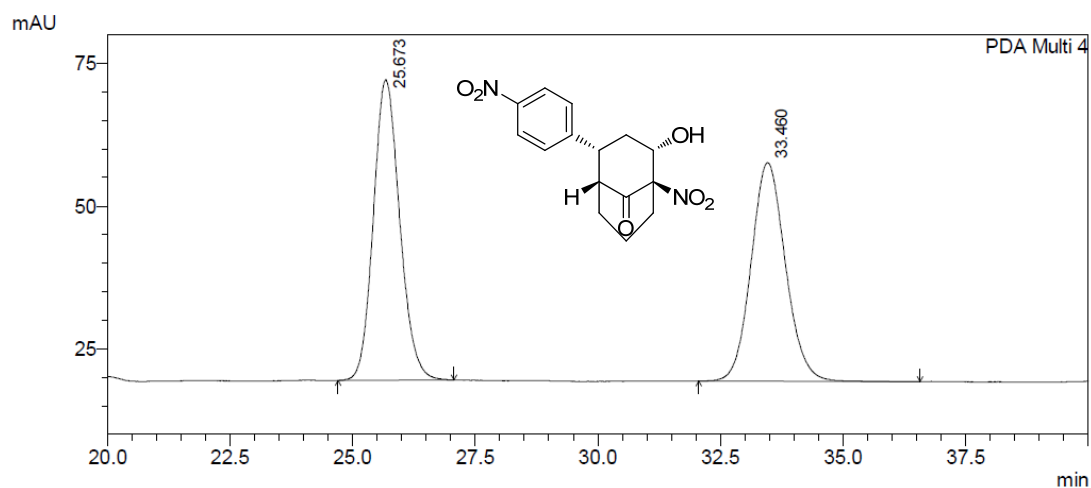

1 PDA Multi 4/254nm 4nm

PeakTable

PDA Ch4 254nm 4nm

| Peak# | Ret. Time | Area    | Height | Area %  | Height % |
|-------|-----------|---------|--------|---------|----------|
| 1     | 25.673    | 1966665 | 52590  | 51.437  | 57.912   |
| 2     | 33.460    | 1856801 | 38221  | 48.563  | 42.088   |
| Total |           | 3823466 | 90811  | 100.000 | 100.000  |

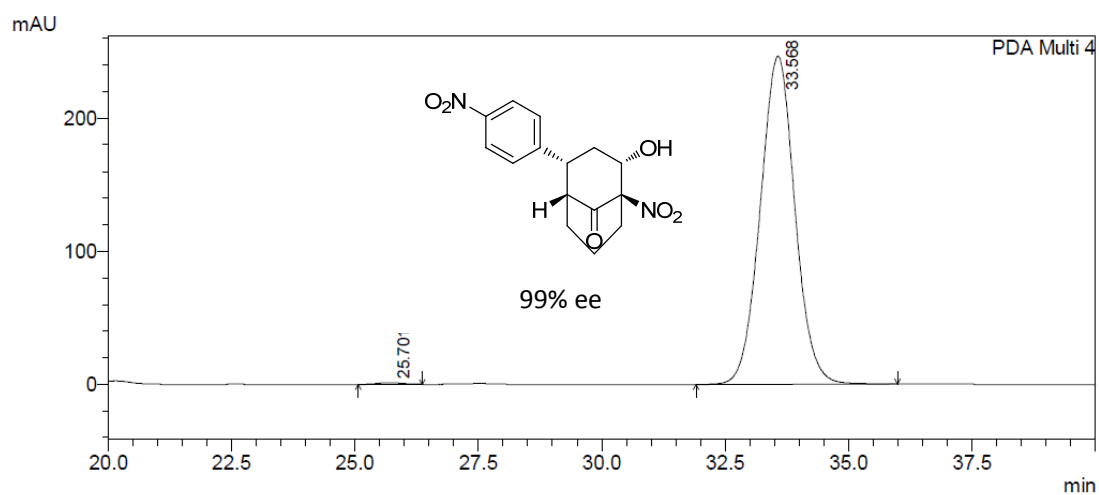

1 PDA Multi 4/254nm 4nm

PeakTable

PDA Ch4 254nm 4nm

| Peak# | Ret. Time | Area     | Height | Area %  | Height % |
|-------|-----------|----------|--------|---------|----------|
| 1     | 25.701    | 43917    | 1246   | 0.363   | 0.503    |
| 2     | 33.568    | 12057281 | 246532 | 99.637  | 99.497   |
| Total |           | 12101198 | 247778 | 100.000 | 100.000  |

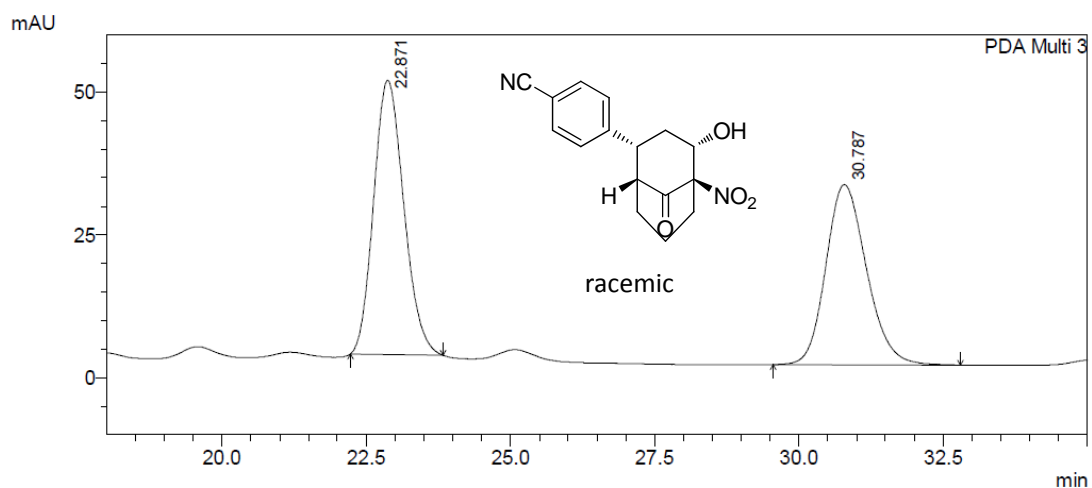

PeakTable

PDA Ch3 230nm 4nm

| Peak# | Ret. Time | Area    | Height | Area %  | Height % |
|-------|-----------|---------|--------|---------|----------|
| 1     | 22.871    | 1747479 | 47960  | 53.065  | 60.350   |
| 2     | 30.787    | 1545603 | 31510  | 46.935  | 39.650   |
| Total |           | 3293082 | 79470  | 100.000 | 100.000  |

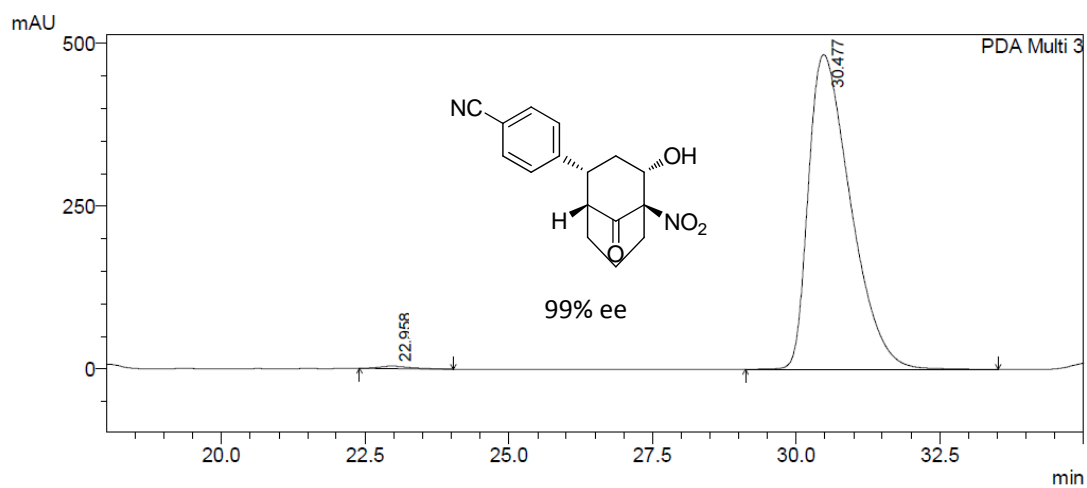

PeakTable

PDA Ch3 230nm 4nm

| Peak# | Ret. Time | Area     | Height | Area %  | Height % |
|-------|-----------|----------|--------|---------|----------|
| 1     | 22.958    | 132165   | 3520   | 0.531   | 0.723    |
| 2     | 30.477    | 24738079 | 483277 | 99.469  | 99.277   |
| Total |           | 24870244 | 486797 | 100.000 | 100.000  |



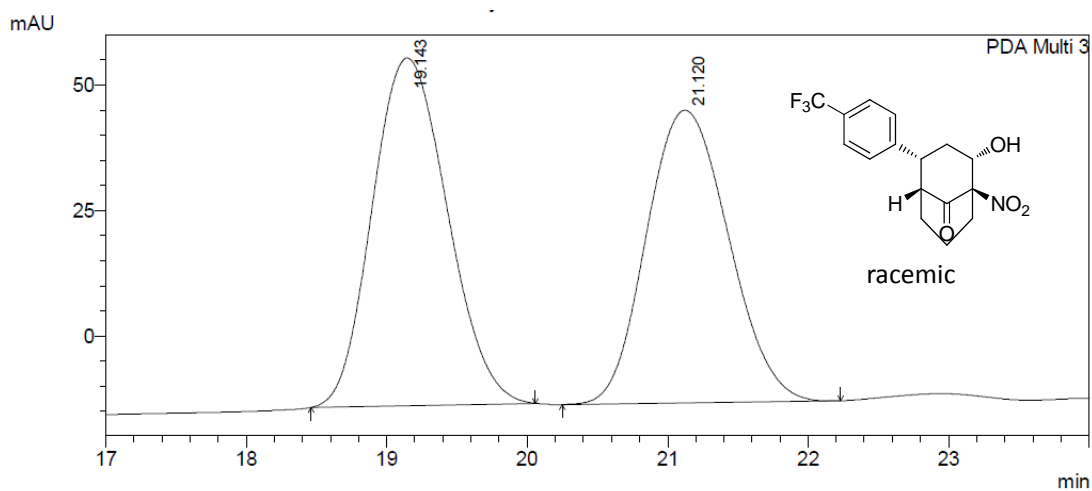

1 PDA Multi 3/230nm 4nm

PeakTable

PDA Ch3 230nm 4nm

| Peak# | Ret. Time | Area    | Height | Area %  | Height % |
|-------|-----------|---------|--------|---------|----------|
| 1     | 19.143    | 2573969 | 69387  | 52.093  | 54.317   |
| 2     | 21.120    | 2367146 | 58356  | 47.907  | 45.683   |
| Total |           | 4941115 | 127743 | 100.000 | 100.000  |

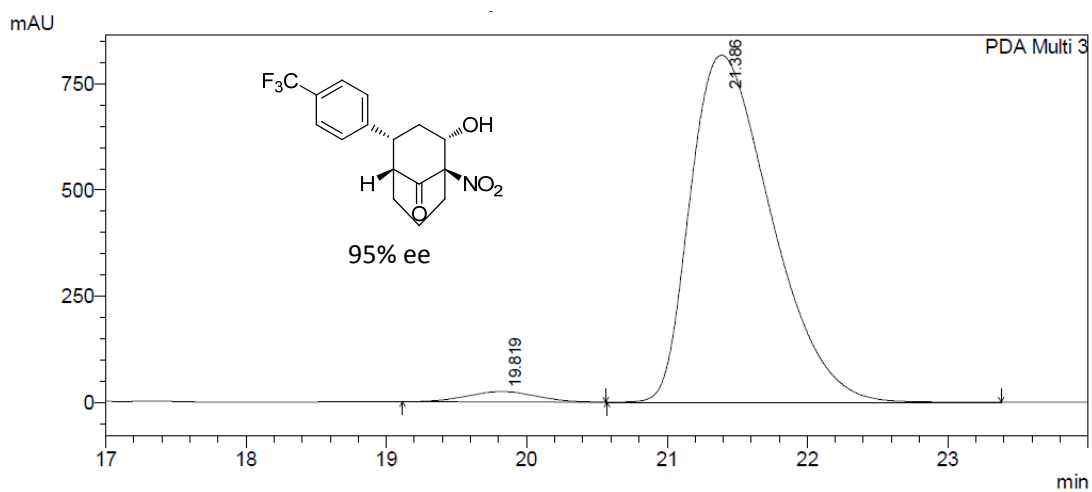

1 PDA Multi 3/230nm 4nm

PeakTable

PDA Ch3 230nm 4nm

| Peak# | Ret. Time | Area     | Height | Area %  | Height % |
|-------|-----------|----------|--------|---------|----------|
| 1     | 19.819    | 830115   | 24156  | 2.471   | 2.870    |
| 2     | 21.386    | 32765677 | 817521 | 97.529  | 97.130   |
| Total |           | 33595792 | 841677 | 100.000 | 100.000  |

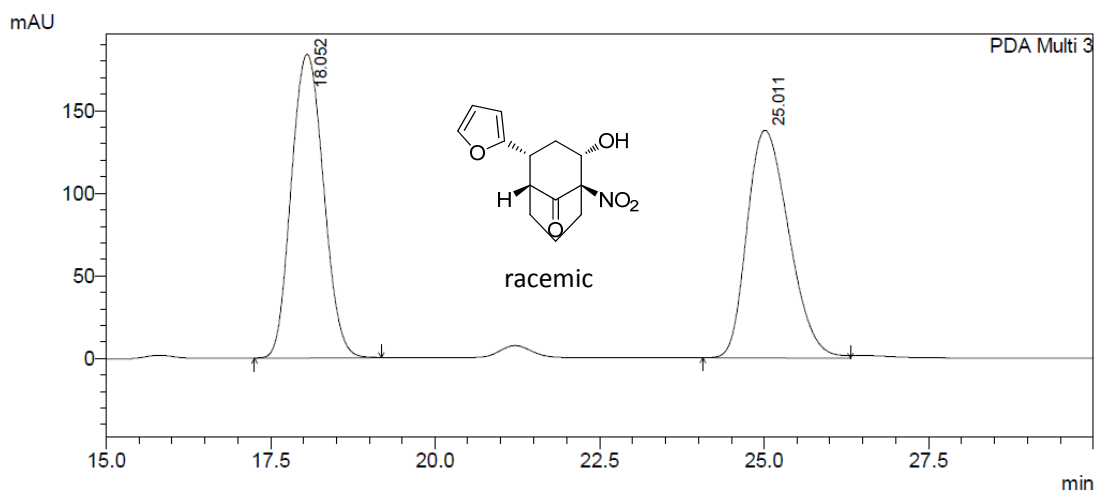

PeakTable

PDA Ch3 230nm 4nm

| Peak# | Ret. Time | Area     | Height | Area %  | Height % |
|-------|-----------|----------|--------|---------|----------|
| 1     | 18.052    | 6275865  | 183853 | 50.652  | 57.131   |
| 2     | 25.011    | 6114239  | 137954 | 49.348  | 42.869   |
| Total |           | 12390104 | 321807 | 100.000 | 100.000  |

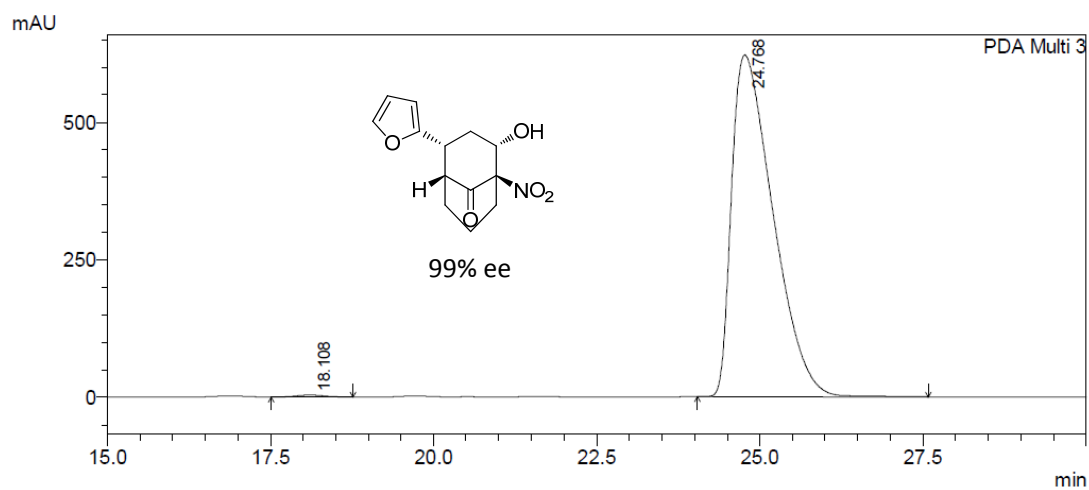

PeakTable

PDA Ch3 230nm 4nm

| Peak# | Ret. Time | Area     | Height | Area %  | Height % |
|-------|-----------|----------|--------|---------|----------|
| 1     | 18.108    | 113606   | 3851   | 0.411   | 0.615    |
| 2     | 24.768    | 27496088 | 621959 | 99.589  | 99.385   |
| Total |           | 27609694 | 625810 | 100.000 | 100.000  |

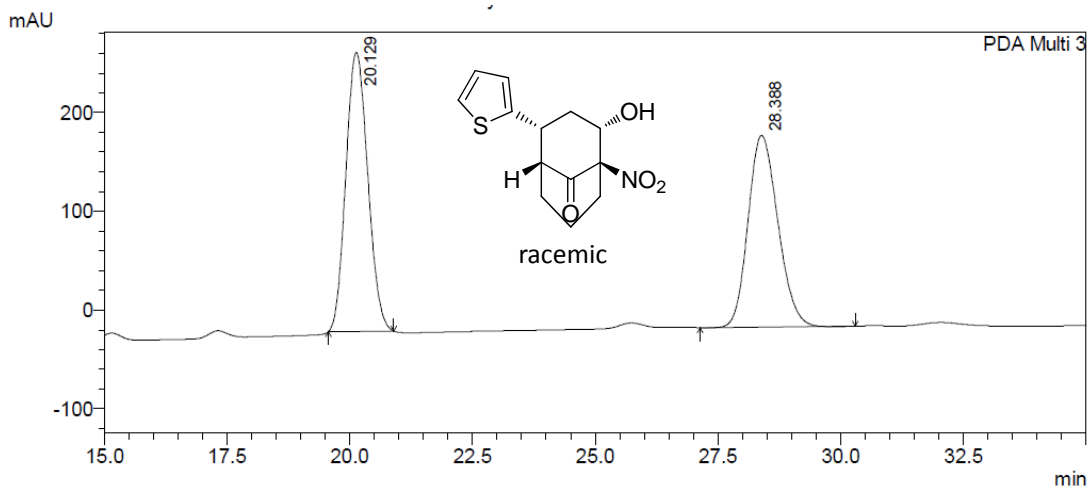

1 PDA Multi 3/230nm 4nm

PeakTable

PDA Ch3 230nm 4nm

| Peak# | Ret. Time | Area     | Height | Area %  | Height % |
|-------|-----------|----------|--------|---------|----------|
| 1     | 20.129    | 8797882  | 282595 | 51.788  | 59.282   |
| 2     | 28.388    | 8190224  | 194099 | 48.212  | 40.718   |
| Total |           | 16988106 | 476694 | 100.000 | 100.000  |

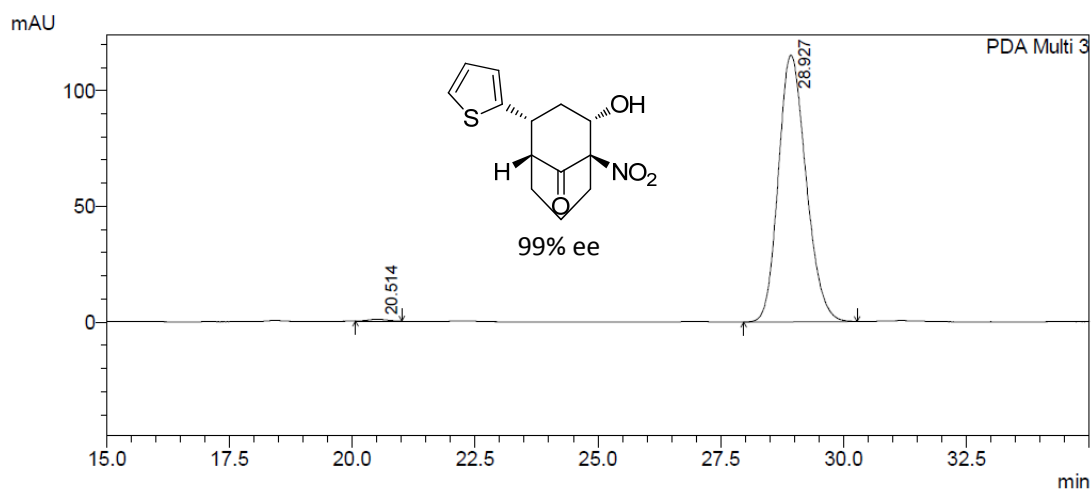

1 PDA Multi 3/230nm 4nm

PeakTable

PDA Ch3 230nm 4nm

| Peak# | Ret. Time | Area    | Height | Area %  | Height % |
|-------|-----------|---------|--------|---------|----------|
| 1     | 20.514    | 23823   | 864    | 0.523   | 0.744    |
| 2     | 28.927    | 4533673 | 115322 | 99.477  | 99.256   |
| Total |           | 4557496 | 116186 | 100.000 | 100.000  |

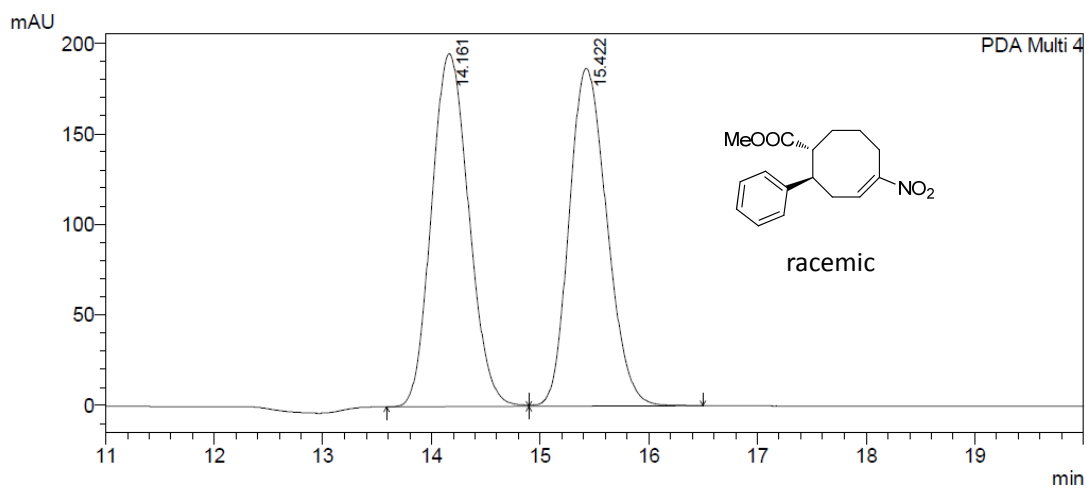

1 PDA Multi 4/254nm 4nm

PeakTable

PDA Ch4 254nm 4nm

| Peak# | Ret. Time | Area    | Height | Area %  | Height % |
|-------|-----------|---------|--------|---------|----------|
| 1     | 14.161    | 4656505 | 194889 | 50.798  | 51.097   |
| 2     | 15.422    | 4510169 | 186520 | 49.202  | 48.903   |
| Total |           | 9166673 | 381408 | 100.000 | 100.000  |

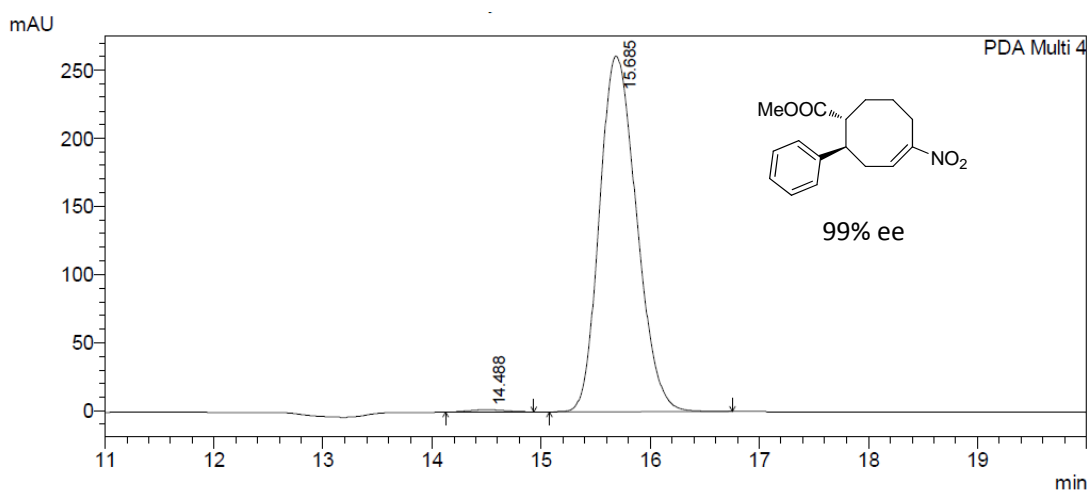

1 PDA Multi 4/254nm 4nm

PeakTable

PDA Ch4 254nm 4nm

| Peak# | Ret. Time | Area    | Height | Area %  | Height % |
|-------|-----------|---------|--------|---------|----------|
| 1     | 14.488    | 36529   | 1627   | 0.588   | 0.620    |
| 2     | 15.685    | 6171052 | 260967 | 99.412  | 99.380   |
| Total |           | 6207581 | 262594 | 100.000 | 100.000  |

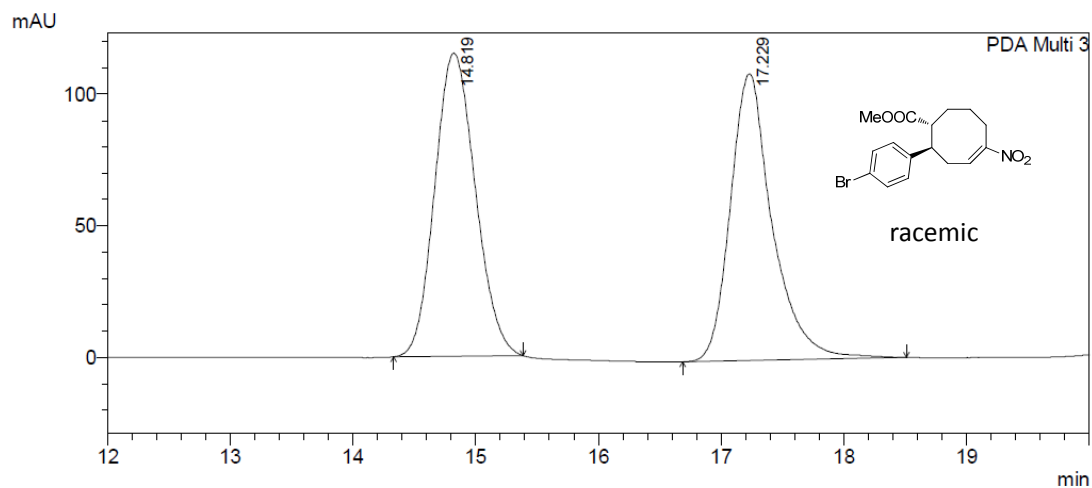

1 PDA Multi 3/230nm 4nm

PeakTable

PDA Ch3 230nm 4nm

| Peak# | Ret. Time | Area    | Height | Area %  | Height % |
|-------|-----------|---------|--------|---------|----------|
| 1     | 14.819    | 2653593 | 115173 | 50.589  | 51.385   |
| 2     | 17.229    | 2591844 | 108963 | 49.411  | 48.615   |
| Total |           | 5245437 | 224136 | 100.000 | 100.000  |

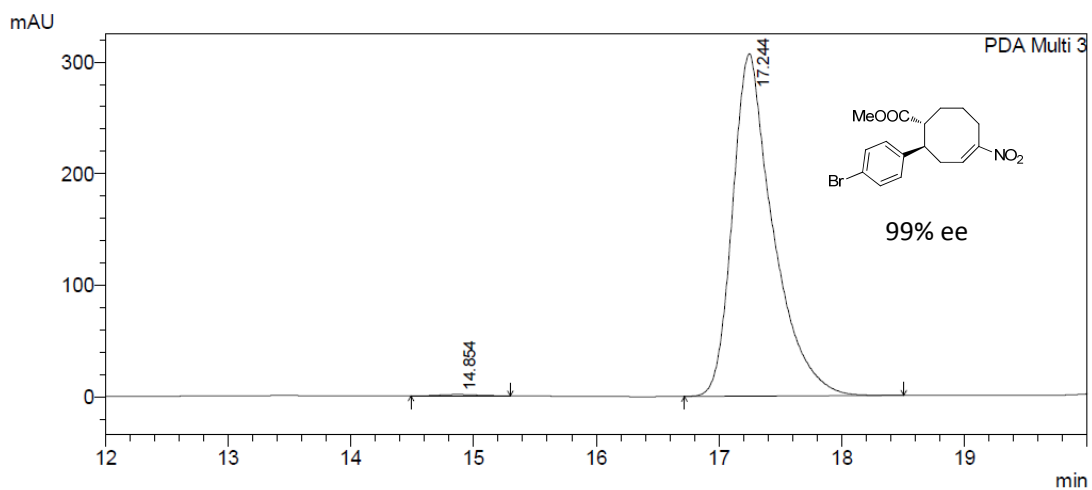

1 PDA Multi 3/230nm 4nm

PeakTable

PDA Ch3 230nm 4nm

| Peak# | Ret. Time | Area    | Height | Area %  | Height % |
|-------|-----------|---------|--------|---------|----------|
| 1     | 14.854    | 28029   | 1329   | 0.396   | 0.432    |
| 2     | 17.244    | 7058363 | 306572 | 99.604  | 99.568   |
| Total |           | 7086392 | 307901 | 100.000 | 100.000  |

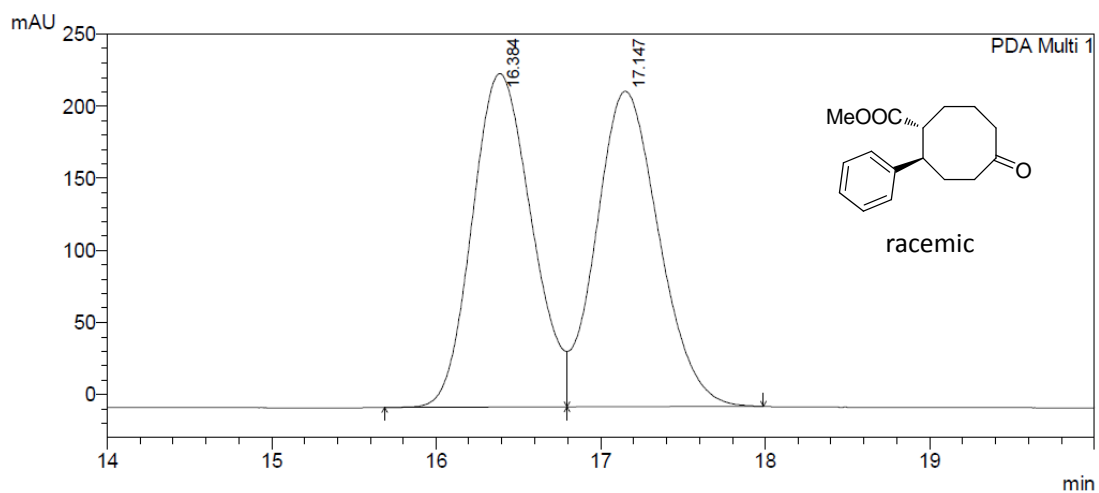

1 PDA Multi 1/208nm 4nm

PeakTable

PDA Ch1 208nm 4nm

| Peak# | Ret. Time | Area     | Height | Area %  | Height % |
|-------|-----------|----------|--------|---------|----------|
| 1     | 16.384    | 5806583  | 231247 | 49.952  | 51.383   |
| 2     | 17.147    | 5817629  | 218796 | 50.048  | 48.617   |
| Total |           | 11624213 | 450043 | 100.000 | 100.000  |

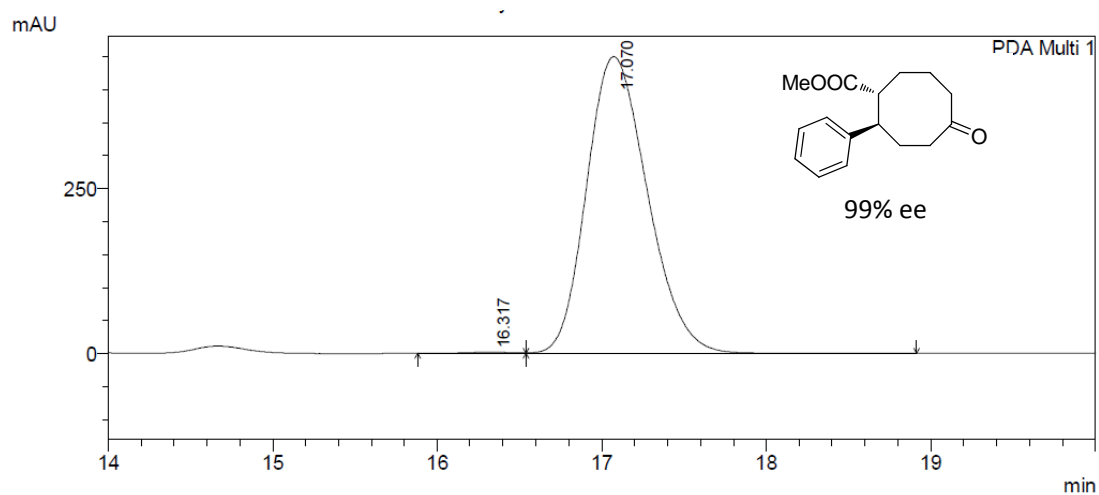

1 PDA Multi 1/208nm 4nm

PeakTable

PDA Ch1 208nm 4nm

| Peak# | Ret. Time | Area     | Height | Area %  | Height % |
|-------|-----------|----------|--------|---------|----------|
| 1     | 16.317    | 39370    | 1904   | 0.339   | 0.422    |
| 2     | 17.070    | 11569675 | 449729 | 99.661  | 99.578   |
| Total |           | 11609045 | 451632 | 100.000 | 100.000  |

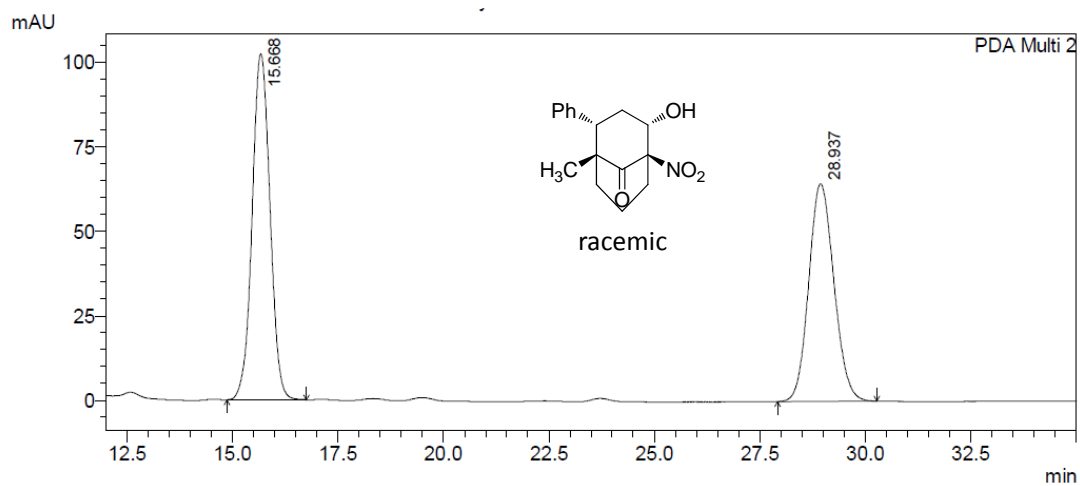

1 PDA Multi 2/220nm 4nm

PeakTable

PDA Ch2 220nm 4nm

| Peak# | Ret. Time | Area    | Height | Area %  | Height % |
|-------|-----------|---------|--------|---------|----------|
| 1     | 15.668    | 3009582 | 102287 | 52.979  | 61.389   |
| 2     | 28.937    | 2671156 | 64334  | 47.021  | 38.611   |
| Total |           | 5680738 | 166620 | 100.000 | 100.000  |

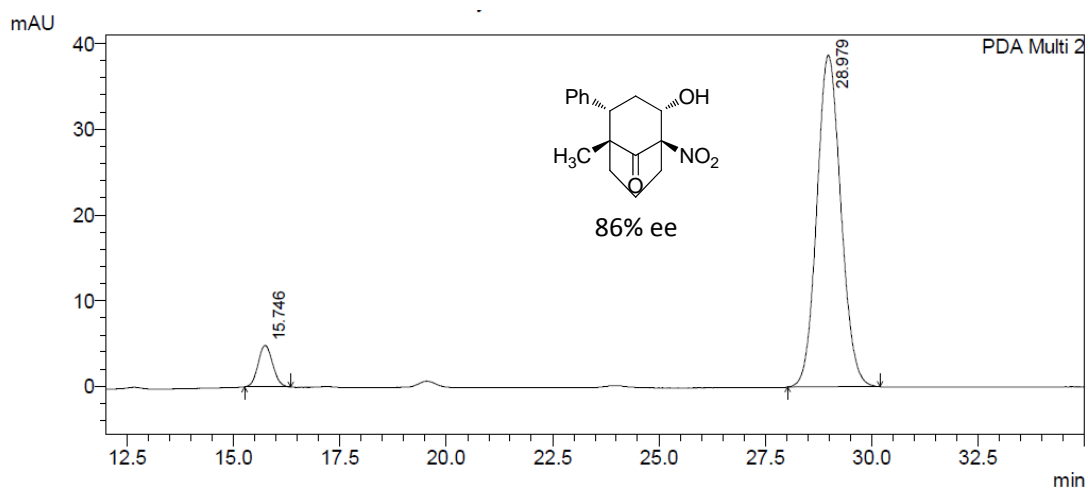

1 PDA Multi 2/220nm 4nm

PeakTable

PDA Ch2 220nm 4nm

| Peak# | Ret. Time | Area    | Height | Area %  | Height % |
|-------|-----------|---------|--------|---------|----------|
| 1     | 15.746    | 115538  | 4852   | 7.059   | 11.139   |
| 2     | 28.979    | 1521195 | 38704  | 92.941  | 88.861   |
| Total |           | 1636733 | 43555  | 100.000 | 100.000  |
